# Supplementary material for: Simulated manned Mars exploration: effects of dietary and diurnal cycle variations on the gut microbiome of crew members in a controlled ecological life support system
Source: PeerJ. 2019 Sep 26;7:e7762. doi: 10.7717/peerj.7762 (PMC6766369; doi:10.7717/peerj.7762)
Supplement: Supplemental Information 11 [file peerj-07-7762-s011.csv]

OTU	Header	F01-1-M	F01-2-M	F01-3-M	F01-4-M	F02-1-M	F02-2-M	F02-3-M	F02-4-M	F03-1-M	F03-2-M	F03-3-M	F03-4-M	F04-1-M	F04-2-M	F04-4-M	F05-1-M	F05-2-M	F05-3-M	F05-4-M	F06-1-M	F06-3-M	F06-4-M	F07-1-M	F07-3-M	F08-1-M	F08-2-M	F08-3-M	F08-4-M	F09-1-M	F09-2-M	F09-3-M	F09-4-M	F10-1-M	F10-2-M	F10-3-M	F10-4-M	F11-1-M	F11-2-M	F11-3-M	F11-4-M	F12-1-M	F12-2-M	F12-3-M	F12-4-M	F13-1-M	F13-2-M	F13-3-M	F13-4-M
OTU	k__Bacteria; p__Proteobacteria; c__Deltaproteobacteria; o__Desulfovibrionales; f__Desulfovibrionaceae; g__Bilophila; s__uncultured_bacterium	259	128	73	103	161	150	127	122	148	50	112	3	197	78	386	51	68	49	39	175	20	110	128	153	175	131	2	394	193	198	74	18	348	14	38	11	78	160	9	15	262	147	0	0	42	40	124	16
OTU	k__Bacteria; p__Firmicutes; c__Clostridia; o__Clostridiales; f__Lachnospiraceae; g__uncultured; s__uncultured_bacterium	0	3	8	3	0	2	1	0	1	0	5	3	3	0	6	0	0	1	0	0	4	0	5	8	4	1	5	2	3	5	40	25	15	3	1	9	38	23	8	13	3	0	0	1	2	0	6	3
OTU	k__Bacteria; p__Proteobacteria; c__Deltaproteobacteria; o__Desulfovibrionales; f__Desulfovibrionaceae; g__Desulfovibrio	57	48	0	10	21	23	8	61	20	34	9	0	1	40	29	116	29	14	5	28	5	102	38	62	9	246	0	1	0	0	0	0	0	0	0	0	0	0	0	0	0	0	0	0	0	0	0	0
OTU	k__Bacteria; p__Bacteroidetes; c__Bacteroidia; o__Bacteroidales; f__Prevotellaceae; g__Prevotella; s__uncultured_bacterium	0	0	0	0	0	0	0	0	0	0	0	0	8	0	88	31	352	251	394	126	53	17	214	48	286	88	1	0	1	0	0	0	0	0	0	0	0	0	0	0	0	1	1	0	3	0	3	0
OTU	k__Bacteria; p__Bacteroidetes; c__Bacteroidia; o__Bacteroidales; f__Bacteroidaceae; g__Bacteroides; s__uncultured_organism	0	0	0	0	0	0	0	0	0	0	0	0	0	0	0	0	0	0	0	0	0	0	0	0	0	0	1	0	1	2	1	0	2	0	0	0	0	0	0	0	0	33	24	19	8	3	3	0
OTU	k__Bacteria; p__Bacteroidetes; c__Bacteroidia; o__Bacteroidales; f__Bacteroidaceae; g__Bacteroides; s__uncultured_bacterium	19	13	103	60	16	25	14	6	36	5	46	1	26	8	11	0	0	0	0	0	0	0	0	1	0	0	44	12	159	169	108	18	208	106	0	23	42	107	5	27	265	5	9	1	1	2	7	0
OTU	k__Bacteria; p__Bacteroidetes; c__Bacteroidia; o__Bacteroidales; f__Prevotellaceae; g__Alloprevotella; s__uncultured_bacterium	0	0	0	0	0	0	0	0	0	0	0	0	0	0	81	0	59	22	25	2	36	0	40	0	37	0	0	0	0	0	0	0	0	0	0	0	0	0	0	0	0	0	0	0	0	0	0	0
OTU	k__Bacteria; p__Bacteroidetes; c__Bacteroidia; o__Bacteroidales; f__Prevotellaceae; g__Prevotella; s__uncultured_bacterium	0	0	1	0	1	0	0	0	0	0	0	0	0	0	2	4	11	10	13	2	1	3	8	0	4	1	0	0	0	0	0	1	1	0	0	0	1	0	0	0	0	343	179	340	540	305	177	344
OTU	k__Bacteria; p__Firmicutes; c__Clostridia; o__Clostridiales; f__Ruminococcaceae; g__uncultured; s__uncultured_bacterium	31	58	4	19	20	19	17	22	34	77	17	1	37	20	0	0	0	0	0	0	0	0	0	0	0	0	0	0	0	0	0	0	0	0	0	0	0	0	0	0	0	10	2	3	1	15	25	1
OTU	k__Bacteria; p__Bacteroidetes; c__Bacteroidia; o__Bacteroidales; f__Bacteroidaceae; g__Bacteroides; s__uncultured_bacterium	0	0	13	0	1	1	4	0	0	2	0	3	0	0	0	18	0	2	0	0	2	1	1	2	2	0	8	0	1	0	0	2	4	0	8	0	11	3	5	0	0	3037	1962	2367	1577	2330	1708	1720
OTU	k__Bacteria; p__Firmicutes; c__Clostridia; o__Clostridiales; f__Lachnospiraceae; g__Incertae_Sedis; s__uncultured_organism	404	1650	373	292	679	741	675	865	1362	240	691	466	736	1011	71	43	8	3	1	86	45	41	107	263	53	61	50	425	109	708	810	1447	1118	1035	470	982	1197	301	303	208	429	47	33	4	44	15	45	85
OTU	k__Bacteria; p__Bacteroidetes; c__Bacteroidia; o__Bacteroidales; f__Bacteroidaceae; g__Bacteroides; s__uncultured_bacterium	5	11	57	30	5	14	9	6	10	0	46	1	15	3	0	0	0	0	0	0	0	0	0	0	0	0	42	0	34	1	22	10	15	71	0	29	25	42	4	38	0	1	18	1	1	2	3	1
OTU	k__Bacteria; p__Bacteroidetes; c__Bacteroidia; o__Bacteroidales; f__Bacteroidaceae; g__Bacteroides; s__uncultured_organism	4	0	20	6	1	4	3	0	10	0	5	0	6	0	1	0	0	0	0	0	0	0	0	0	0	0	2	0	6	19	9	0	10	4	0	1	10	10	2	4	27	0	19	0	0	0	2	1
OTU	k__Bacteria; p__Bacteroidetes; c__Bacteroidia; o__Bacteroidales; f__Bacteroidaceae; g__Bacteroides; s__uncultured_bacterium	291	308	112	246	353	147	122	187	241	187	108	7	288	202	72	56	2	19	0	95	0	69	4	103	5	9	3694	1430	5215	3944	2002	1645	7026	3614	536	512	923	1599	137	1435	12441	341	296	256	109	145	245	95
OTU	k__Bacteria; p__Firmicutes; c__Clostridia; o__Clostridiales; f__Ruminococcaceae; g__uncultured; s__uncultured_bacterium	1295	1558	538	1129	1329	816	855	1224	455	2480	902	344	870	546	43	65	170	56	26	253	30	705	240	157	64	140	4	24	1	0	0	0	3	1	4	1	0	0	0	3	0	1406	0	222	57	253	515	176
OTU	k__Bacteria; p__Bacteroidetes; c__Bacteroidia; o__Bacteroidales; f__Bacteroidaceae; g__Bacteroides; s__uncultured_bacterium	207	137	35	365	209	130	118	140	260	467	109	10	384	187	69	43	1	19	2	109	2	126	4	181	13	24	8	2	10	1	3	2	8	2	2	0	0	2	1	5	24	5	5	16	2	33	78	1
OTU	k__Bacteria; p__Firmicutes; c__Clostridia; o__Clostridiales; f__Lachnospiraceae; g__Incertae_Sedis; s__uncultured_bacterium	205	177	40	46	62	102	107	181	258	203	129	115	159	143	39	179	21	8	12	190	24	210	68	354	58	106	0	6	0	70	34	188	315	305	580	494	173	65	27	19	180	36	4	9	24	21	72	29
OTU	k__Bacteria; p__Firmicutes; c__Clostridia; o__Clostridiales; f__Family_XIII; g__uncultured; s__uncultured_bacterium	60	78	101	121	25	45	70	122	18	1	106	11	23	24	0	0	0	0	0	0	0	0	0	0	0	0	0	1	0	0	0	0	0	0	0	0	0	0	0	0	0	0	0	0	0	0	0	0
OTU	k__Bacteria; p__Proteobacteria; c__Gammaproteobacteria; o__Enterobacteriales; f__Enterobacteriaceae	4	1	4	0	1	0	2	1	1	0	0	0	0	0	0	2	2	0	0	0	0	2	0	0	0	0	519	4	56	0	0	0	0	0	6	0	1	1	0	21	0	0	0	0	0	0	0	0
OTU	k__Bacteria; p__Bacteroidetes; c__Bacteroidia; o__Bacteroidales; f__Bacteroidaceae; g__Bacteroides; s__uncultured_bacterium	165	94	27	81	325	275	310	168	267	46	88	19	193	169	7	18	2	0	0	12	0	0	0	1	1	1	0	1	0	0	0	0	0	0	0	0	0	0	0	2	1	6	23	9	6	27	25	0
OTU	k__Bacteria; p__Bacteroidetes; c__Bacteroidia; o__Bacteroidales; f__Prevotellaceae; g__Prevotella; s__uncultured_bacterium	0	0	0	0	0	0	0	0	0	0	0	0	0	0	1	0	3	7	10	0	3	0	8	2	8	2	0	0	0	0	0	0	0	0	0	0	0	0	0	0	0	68	43	54	80	57	31	47
OTU	k__Bacteria; p__Bacteroidetes; c__Bacteroidia; o__Bacteroidales; f__Porphyromonadaceae; g__Parabacteroides	944	564	177	887	2436	1962	1132	2607	2418	2864	1412	97	1861	1488	372	844	117	151	62	476	10	252	222	894	199	777	180	983	241	2233	821	395	604	160	61	194	343	229	20	50	17	602	1604	446	423	1041	748	300
OTU	k__Bacteria; p__Bacteroidetes; c__Bacteroidia; o__Bacteroidales; f__Prevotellaceae; g__Prevotella; s__uncultured_bacterium	0	0	1	0	0	0	0	0	0	0	0	1	0	0	105	0	319	132	192	39	39	0	152	5	220	22	0	0	0	0	0	0	0	0	0	0	0	0	0	0	0	0	0	0	0	0	0	0
OTU	k__Bacteria; p__Firmicutes; c__Clostridia; o__Clostridiales; f__Ruminococcaceae; g__uncultured; s__uncultured_bacterium	0	0	0	0	0	1	0	0	0	0	0	0	1	0	53	145	55	56	7	68	4	90	41	234	85	302	1	0	0	0	0	0	0	0	0	0	1	0	0	0	0	130	10	18	2	52	41	2
OTU	k__Bacteria; p__Firmicutes; c__Clostridia; o__Clostridiales; f__Lachnospiraceae; g__Roseburia; s__uncultured_bacterium	320	545	2434	2950	512	1246	2676	1960	44	9	105	1190	352	1325	196	903	277	189	333	1820	1111	606	1642	726	869	479	12	313	1049	84	227	1063	1035	430	386	508	3035	9337	433	898	127	3589	1	485	38	1816	1980	767
OTU	k__Bacteria; p__Bacteroidetes; c__Bacteroidia; o__Bacteroidales; f__Prevotellaceae; g__Prevotella; s__uncultured_bacterium	0	0	1	0	0	0	0	0	0	0	0	0	0	0	0	2	1	3	0	0	0	0	0	0	0	0	0	0	0	0	0	0	0	0	0	0	0	0	0	0	0	25	15	33	51	27	9	22
OTU	k__Bacteria; p__Bacteroidetes; c__Bacteroidia; o__Bacteroidales; f__Bacteroidaceae; g__Bacteroides	449	167	166	85	36	26	108	130	171	523	313	43	632	233	78	125	3	6	6	92	1	36	19	53	13	39	66	44	44	29	20	21	59	11	13	5	28	43	1	7	483	74	419	18	13	87	108	102
OTU	k__Bacteria; p__Bacteroidetes; c__Bacteroidia; o__Bacteroidales; f__Prevotellaceae; g__uncultured; s__uncultured_bacterium	0	0	0	0	0	0	0	0	0	0	0	0	0	0	16	0	32	27	34	7	15	0	42	8	106	2	0	0	0	0	0	0	0	0	0	0	0	0	0	0	0	0	0	0	0	0	0	0
OTU	k__Bacteria; p__Bacteroidetes; c__Bacteroidia; o__Bacteroidales; f__Prevotellaceae; g__Prevotella; s__uncultured_bacterium	0	0	0	0	0	0	0	0	0	0	0	0	0	0	0	0	0	2	0	0	0	0	1	0	1	0	0	0	0	0	0	0	1	0	0	0	0	0	0	0	0	50	29	63	94	48	37	55
OTU	k__Bacteria; p__Firmicutes; c__Clostridia; o__Clostridiales; f__Lachnospiraceae; g__Incertae_Sedis; s__uncultured_organism	95	490	275	234	56	128	281	230	51	34	249	487	97	42	1270	65	261	919	441	231	613	38	221	303	622	781	864	1045	712	2758	3198	1857	432	268	39	231	1267	853	238	1218	528	255	673	554	217	180	370	479
OTU	k__Bacteria; p__Firmicutes; c__Clostridia; o__Clostridiales; f__Ruminococcaceae; g__uncultured; s__uncultured_bacterium	2	7	0	16	50	57	45	33	16	12	13	1	30	11	13	17	18	14	5	37	16	50	166	65	26	16	0	0	0	0	0	0	0	0	0	0	0	0	0	0	0	10	10	105	3	37	118	5
OTU	k__Bacteria; p__Firmicutes; c__Clostridia; o__Clostridiales; f__Lachnospiraceae; g__Marvinbryantia; s__uncultured_bacterium	3	9	1	1	4	3	2	6	10	5	5	6	4	6	5	5	0	1	2	10	1	7	4	23	2	13	1	21	2	4	0	9	5	5	6	3	3	9	9	0	7	7	0	4	4	3	7	4
OTU	k__Bacteria; p__Bacteroidetes; c__Bacteroidia; o__Bacteroidales; f__Prevotellaceae; g__Prevotella; s__uncultured_bacterium	0	0	0	0	0	0	0	0	0	0	0	0	2	0	7	33	98	86	103	60	18	16	87	8	97	14	0	0	0	0	0	0	0	0	0	0	0	0	0	0	0	1	0	0	0	0	0	1
OTU	k__Bacteria; p__Firmicutes; c__Erysipelotrichia; o__Erysipelotrichales; f__Erysipelotrichaceae; g__Incertae_Sedis; s__uncultured_bacterium	0	1	0	0	0	0	0	0	0	0	0	0	0	0	0	0	0	0	0	0	0	0	0	0	0	0	14	57	20	12	22	42	66	12	35	4	25	2	26	11	13	0	0	0	0	0	0	0
OTU	k__Bacteria; p__Firmicutes; c__Clostridia; o__Clostridiales; f__Ruminococcaceae; g__Faecalibacterium; s__uncultured_bacterium	0	0	1	0	0	0	0	0	0	0	0	0	0	0	0	1	0	0	0	0	0	0	0	0	0	0	0	0	0	0	0	0	0	0	0	0	0	0	0	0	0	63	50	50	9	24	27	52
OTU	k__Bacteria; p__Firmicutes; c__Clostridia; o__Clostridiales; f__Lachnospiraceae; g__Incertae_Sedis; s__uncultured_bacterium	6	2	7	323	13	0	0	0	0	0	0	0	0	0	471	10	22	31	12	56	3	0	4	109	46	0	0	0	0	25	2	2	0	0	0	0	0	0	0	0	0	0	0	0	0	0	0	0
OTU	k__Bacteria; p__Bacteroidetes; c__Bacteroidia; o__Bacteroidales; f__Bacteroidaceae; g__Bacteroides; s__uncultured_bacterium	0	0	6	0	1	0	1	0	0	0	0	0	2	0	0	0	0	0	0	0	0	0	0	0	0	0	10	0	1	3	4	1	1	1	0	0	2	0	2	1	0	37	24	7	33	7	0	9
OTU	k__Bacteria; p__Firmicutes; c__Clostridia; o__Clostridiales; f__Ruminococcaceae; g__uncultured; s__uncultured_bacterium	6	13	2	10	16	16	7	10	25	364	16	1	13	6	19	25	3	3	5	21	5	253	15	29	8	19	0	0	0	0	0	0	0	0	1	0	0	0	0	0	29	17	9	19	4	22	36	1
OTU	k__Bacteria; p__Bacteroidetes; c__Bacteroidia; o__Bacteroidales; f__Prevotellaceae; g__Prevotella; s__uncultured_bacterium	0	0	0	0	0	0	0	0	0	0	0	0	0	0	0	1	1	1	1	0	0	0	0	0	2	0	0	0	0	0	0	0	0	0	0	0	0	0	1	0	0	28	15	40	52	27	17	28
OTU	k__Bacteria; p__Bacteroidetes; c__Bacteroidia; o__Bacteroidales; f__Prevotellaceae; g__Prevotella; s__uncultured_bacterium	2	0	4	1	0	0	0	1	1	0	1	3	78	2	5959	398	5149	2371	2653	4626	1737	615	3273	571	3464	3344	0	0	0	0	0	0	1	0	4	3	0	0	3	1	0	1	0	1	0	0	0	0
OTU	k__Bacteria; p__Firmicutes; c__Clostridia; o__Clostridiales; f__Lachnospiraceae; g__Incertae_Sedis; s__uncultured_bacterium	95	124	226	94	85	104	78	93	73	590	177	87	102	102	1018	301	144	54	37	211	159	1470	318	1008	130	191	105	529	58	144	111	288	196	92	778	317	100	64	36	21	522	212	95	86	49	33	84	76
OTU	k__Bacteria; p__Proteobacteria; c__Gammaproteobacteria; o__Enterobacteriales; f__Enterobacteriaceae; g__Escherichia-Shigella	666	412	609	41	253	35	7	10	106	8	9	161	14	135	1362	4591	77	41	19	99	5	374	6	5	100	335	298	2622	7701	287	1161	44	70	78	39	120	232	18	7922	10	96	27	199	23	2	13	1	0
OTU	k__Bacteria; p__Actinobacteria; c__Coriobacteriia; o__Coriobacteriales; f__Coriobacteriaceae; g__uncultured; s__uncultured_bacterium	1	10	1	4	3	2	5	12	2	149	8	4	5	25	0	0	0	0	0	0	0	0	0	0	0	0	0	0	0	0	0	0	0	0	0	0	0	0	1	0	0	0	0	0	0	0	0	0
OTU	k__Bacteria; p__Bacteroidetes; c__Bacteroidia; o__Bacteroidales; f__Bacteroidaceae; g__Bacteroides; s__uncultured_bacterium	143	126	20	53	79	53	24	26	14	27	65	0	32	10	27	14	10	3	0	25	0	36	5	17	19	18	0	0	0	0	0	0	0	0	0	0	1	0	0	0	0	2	0	1	1	8	5	0
OTU	k__Bacteria; p__Bacteroidetes; c__Bacteroidia; o__Bacteroidales; f__Porphyromonadaceae; g__Parabacteroides	148	140	47	104	89	79	48	69	94	66	48	9	158	116	93	16	8	3	3	6	1	2	7	10	6	31	0	3	3	0	1	2	3	0	0	8	9	5	0	3	135	4	3	3	4	22	15	37
OTU	k__Bacteria; p__Firmicutes; c__Clostridia; o__Clostridiales; f__Lachnospiraceae; g__uncultured; s__uncultured_bacterium	8	9	2	2	2	3	6	2	2	11	2	6	2	3	18	2	2	0	0	1	13	22	2	13	6	5	0	1	0	0	0	0	0	0	0	0	0	0	0	0	4	18	8	5	6	2	6	8
OTU	k__Bacteria; p__Firmicutes; c__Negativicutes; o__Selenomonadales; f__Veillonellaceae; g__Dialister; s__uncultured_bacterium	1253	917	4	1426	1495	1468	1168	1876	609	477	1606	646	958	2084	3688	6151	1729	3666	3533	8065	14768	15415	6570	5306	7596	11551	1	8	2	4	1	5	0	0	11	2	2	2	6	10	359	0	0	0	1	0	1	3
OTU	k__Bacteria; p__Firmicutes; c__Clostridia; o__Clostridiales; f__Ruminococcaceae; g__Incertae_Sedis; s__uncultured_bacterium	2	35	1	14	3	5	2	1	2	76	8	18	3	1	1	2	0	0	0	0	1	9	3	2	0	0	2	4	1	1	1	6	0	0	9	1	2	0	0	0	1	0	0	0	0	0	0	1
OTU	k__Bacteria; p__Bacteroidetes; c__Bacteroidia; o__Bacteroidales; f__Porphyromonadaceae; g__Butyricimonas; s__uncultured_bacterium	51	203	44	95	119	79	13	52	197	46	20	0	237	35	0	0	0	0	0	0	0	0	0	0	0	0	0	3	0	0	0	0	0	0	0	0	0	0	0	2	0	8	3	1	0	2	2	0
OTU	k__Bacteria; p__Tenericutes; c__Mollicutes; o__RF9; f__uncultured_bacterium;	0	0	1	16	144	10	4	81	3	45	2	1	339	3	0	0	0	0	0	0	0	0	0	0	0	0	0	0	0	0	0	0	0	0	0	0	0	0	0	0	0	0	0	0	0	0	0	0
OTU	k__Bacteria; p__Firmicutes; c__Clostridia; o__Clostridiales; f__Peptostreptococcaceae; g__Incertae_Sedis; s__uncultured_bacterium	108	36	194	453	76	178	109	154	136	257	101	18	66	87	14	311	210	336	315	83	1904	48	188	1	5	39	153	150	32	65	98	3446	98	81	3505	4636	34	28	3835	488	10	75	0	408	631	49	557	975
OTU	k__Bacteria; p__Firmicutes; c__Clostridia; o__Clostridiales; f__Lachnospiraceae; g__Incertae_Sedis; s__uncultured_bacterium	0	0	0	3	3	1	0	7	1	2	11	19	9	1	0	0	0	0	0	0	0	0	0	0	0	0	0	0	0	0	0	0	0	0	0	0	1	0	0	0	4	6	0	33	9	3	7	26
OTU	k__Bacteria; p__Actinobacteria; c__Coriobacteriia; o__Coriobacteriales; f__Coriobacteriaceae; g__Eggerthella; s__uncultured_bacterium	3	1	0	0	0	0	0	0	0	1	1	0	0	0	2	2	0	0	0	0	0	20	0	1	0	0	3	24	5	14	4	6	16	6	632	6	3	5	2	0	13	0	1	0	0	0	3	0
OTU	k__Bacteria; p__Firmicutes; c__Clostridia; o__Clostridiales; f__Lachnospiraceae; g__Incertae_Sedis; s__uncultured_bacterium	62	287	44	348	208	590	1550	593	866	29	594	1034	1035	2270	0	1	0	0	1	2	1	1	1	0	0	13	0	4	1	90	33	147	269	65	43	72	99	56	18	7	156	24	0	953	81	194	151	832
OTU	k__Bacteria; p__Firmicutes; c__Clostridia; o__Clostridiales; f__Ruminococcaceae; g__Faecalibacterium; s__uncultured_bacterium	5770	4865	10072	5115	4802	7177	6299	3798	3406	1814	3082	9898	1542	2272	2071	1213	1019	2757	1118	2099	2072	3437	2348	4841	1455	1792	1989	2933	861	1676	1144	6235	3872	1955	8165	5209	2434	987	222	135	4506	3504	3247	3690	2137	2909	3661	5595
OTU	k__Bacteria; p__Firmicutes; c__Clostridia; o__Clostridiales; f__Family_XIII; g__uncultured; s__uncultured_bacterium	14	15	0	6	13	7	5	8	12	38	12	0	15	8	17	163	1	4	1	51	5	51	33	103	11	63	8	52	3	12	7	1	21	2	226	2	2	7	0	0	19	2	3	0	0	1	1	0
OTU	k__Bacteria; p__Bacteroidetes; c__Bacteroidia; o__Bacteroidales; f__Prevotellaceae; g__Prevotella; s__uncultured_bacterium	0	0	1	0	0	0	0	0	0	0	0	0	0	0	0	0	0	1	0	0	0	0	0	1	1	1	0	0	0	0	0	0	0	0	0	0	0	0	0	0	0	4	5	19	22	17	46	14
OTU	k__Bacteria; p__Firmicutes; c__Clostridia; o__Clostridiales; f__Ruminococcaceae; g__uncultured; s__uncultured_bacterium	102	161	102	245	48	54	44	158	141	619	93	1	152	120	17	4037	81	402	122	509	12	2170	210	377	868	327	0	6	0	0	0	0	0	0	1	0	0	0	1	0	0	0	0	0	0	1	0	0
OTU	k__Bacteria; p__Bacteroidetes; c__Bacteroidia; o__Bacteroidales; f__Prevotellaceae; g__Prevotella; s__uncultured_bacterium	0	0	0	0	0	0	0	0	0	0	0	0	0	0	0	0	0	4	0	1	1	0	0	0	1	0	0	0	0	0	0	0	0	0	0	0	0	0	0	0	0	25	15	28	33	19	9	19
OTU	k__Bacteria; p__Firmicutes; c__Clostridia; o__Clostridiales; f__Lachnospiraceae; g__Anaerostipes; s__uncultured_bacterium	135	162	82	92	90	96	140	172	252	74	160	224	82	487	28	32	3	6	2	111	26	47	12	203	28	35	0	7	1	0	0	4	2	0	0	1	0	0	2	4	843	25	2	57	36	27	59	57
OTU	k__Bacteria; p__Bacteroidetes; c__Bacteroidia; o__Bacteroidales; f__Bacteroidaceae; g__Bacteroides; s__uncultured_bacterium	69	11	12	12	35	23	12	32	41	22	77	5	93	55	1	9	0	1	0	1	0	4	0	0	0	19	833	330	594	529	356	169	262	151	409	65	405	420	68	184	408	94	330	50	21	42	36	21
OTU	k__Bacteria; p__Bacteroidetes; c__Bacteroidia; o__Bacteroidales; f__Prevotellaceae; g__Prevotella; s__uncultured_bacterium	0	0	0	0	0	0	0	0	0	0	0	0	0	0	24	0	41	14	22	6	13	0	24	2	47	2	0	0	0	0	0	0	0	0	0	0	0	0	0	0	0	0	0	0	0	0	0	0
OTU	k__Bacteria; p__Firmicutes; c__Clostridia; o__Clostridiales; f__Lachnospiraceae; g__uncultured; s__uncultured_bacterium	20	79	14	11	42	48	24	45	95	8	29	25	26	52	13	17	0	1	1	16	8	28	25	58	10	36	0	0	0	0	0	0	0	0	0	0	0	0	0	0	9	10	0	1	2	1	4	0
OTU	k__Bacteria; p__Bacteroidetes; c__Bacteroidia; o__Bacteroidales; f__Bacteroidaceae; g__Bacteroides; s__uncultured_bacterium	2	1	2	0	0	1	0	0	3	0	0	0	0	0	0	0	0	0	0	0	0	0	0	0	0	0	33	1	47	37	24	12	68	43	0	4	23	29	1	27	94	0	0	3	0	0	1	1
OTU	k__Bacteria; p__Bacteroidetes; c__Bacteroidia; o__Bacteroidales; f__Prevotellaceae; g__Prevotella; s__uncultured_bacterium	0	0	0	0	0	0	0	0	0	0	0	0	0	0	2	0	1	1	0	0	0	0	1	2	1	0	0	0	0	0	0	0	0	0	0	0	0	0	0	0	0	37	27	27	37	25	63	28
OTU	k__Bacteria; p__Bacteroidetes; c__Bacteroidia; o__Bacteroidales; f__Porphyromonadaceae; g__Parabacteroides; s__uncultured_organism	0	0	0	0	4	2	0	2	2	2	1	1	9	20	7	5	0	0	0	6	0	2	6	3	1	18	19	59	21	2	1	2	9	0	2	2	3	7	0	0	4	23	67	3	1	5	2	0
OTU	k__Bacteria; p__Bacteroidetes; c__Bacteroidia; o__Bacteroidales; f__Prevotellaceae; g__Paraprevotella; s__uncultured_bacterium	0	0	0	0	0	0	0	0	0	0	0	0	0	0	0	0	0	0	0	0	0	0	0	0	0	0	47	1	26	30	45	9	65	58	3	17	29	64	3	23	0	0	0	5	1	0	3	0
OTU	k__Bacteria; p__Firmicutes; c__Clostridia; o__Clostridiales; f__Ruminococcaceae; g__Ruminococcus; s__uncultured_bacterium	331	235	237	92	112	117	117	144	75	375	176	62	93	79	26	142	6	50	73	122	58	8	49	110	48	235	0	5	0	0	0	0	0	0	2	0	0	0	0	0	0	0	0	0	0	0	0	0
OTU	k__Bacteria; p__Actinobacteria; c__Coriobacteriia; o__Coriobacteriales; f__Coriobacteriaceae	40	16	5	3	2	3	6	3	5	34	10	17	6	12	30	26	10	2	2	22	2	48	4	12	8	7	0	0	0	0	0	2	1	0	0	0	0	0	1	0	12	0	0	0	0	0	0	0
OTU	k__Bacteria; p__Tenericutes; c__Mollicutes; o__RF9; f__uncultured_bacterium;	49	118	5	32	154	17	27	317	127	717	3	1	130	35	0	0	0	0	0	0	0	0	0	0	0	0	1	3	0	0	0	0	0	0	0	0	0	0	0	0	0	0	0	0	0	13	1	0
OTU	k__Bacteria; p__Firmicutes; c__Clostridia; o__Clostridiales; f__Ruminococcaceae; g__Faecalibacterium; s__uncultured_bacterium	1	0	5	0	0	1	0	0	0	0	0	4	0	0	0	1	0	0	0	0	0	0	0	1	0	0	0	1	0	0	0	1	0	0	1	0	0	0	0	0	1	33	18	20	5	18	47	26
OTU	k__Bacteria; p__Firmicutes; c__Clostridia; o__Clostridiales; f__Ruminococcaceae; g__Incertae_Sedis; s__uncultured_bacterium	68	137	7	44	33	9	12	25	15	430	33	57	31	8	232	53	5	69	20	61	119	56	62	59	129	34	78	209	34	67	151	143	111	12	276	16	141	133	7	18	10	33	20	32	7	17	43	44
OTU	k__Bacteria; p__Bacteroidetes; c__Bacteroidia; o__Bacteroidales	33	27	4	38	37	16	21	18	31	21	5	1	32	20	0	1	0	0	0	1	0	0	0	0	0	0	0	0	0	1	0	0	0	0	0	1	0	0	0	0	0	8	5	11	4	2	7	0
OTU	k__Bacteria; p__Firmicutes; c__Clostridia; o__Clostridiales; f__Lachnospiraceae; g__Incertae_Sedis; s__uncultured_organism	108	8	7	11	27	7	1	8	9	0	6	1	6	3	0	0	0	0	1	0	0	0	0	0	0	0	319	253	95	477	75	76	569	70	9	89	170	97	125	53	94	29	2	7	3	11	29	2
OTU	k__Bacteria; p__Bacteroidetes; c__Bacteroidia; o__Bacteroidales; f__Prevotellaceae; g__Prevotella; s__uncultured_bacterium	0	0	0	0	0	0	0	0	0	0	0	0	0	0	2	0	13	22	60	11	11	0	17	7	42	13	0	0	0	0	0	0	0	0	0	0	0	0	0	0	0	0	1	0	0	0	0	0
OTU	k__Bacteria; p__Firmicutes; c__Clostridia; o__Clostridiales; f__Ruminococcaceae; g__uncultured; s__uncultured_bacterium	0	5	2	1	3	6	2	0	1	0	4	3	1	4	2	0	1	6	1	1	0	4	1	3	3	5	0	0	0	0	0	0	0	0	0	0	0	0	0	0	25	13	5	13	4	17	18	1
OTU	k__Bacteria; p__Firmicutes; c__Erysipelotrichia; o__Erysipelotrichales; f__Erysipelotrichaceae; g__Catenibacterium; s__uncultured_bacterium	0	1	0	1	0	0	1	0	0	0	0	1	13	0	3608	823	1067	377	540	1374	4686	3069	2596	3434	605	693	0	0	0	1	0	1	0	0	8	1	0	1	3	5	0	0	1	0	0	0	0	0
OTU	k__Bacteria; p__Firmicutes; c__Clostridia; o__Clostridiales; f__Ruminococcaceae; g__Incertae_Sedis; s__uncultured_bacterium	2	2	0	4	28	31	12	18	20	46	4	0	21	6	0	2	0	0	0	2	0	2	0	2	0	1	0	0	0	0	0	0	0	0	0	0	0	0	0	1	0	0	0	0	0	0	0	0
OTU	k__Bacteria; p__Firmicutes; c__Clostridia; o__Clostridiales; f__Christensenellaceae; g__uncultured; s__uncultured_bacterium	143	21	35	23	10	9	28	11	24	2	5	550	297	12	169	155	108	105	43	493	35	139	57	110	461	275	27	24	17	3	3	2	21	0	5	4	9	18	0	0	56	144	5	210	35	144	415	73
OTU	k__Bacteria; p__Actinobacteria; c__Actinobacteria; o__Micrococcales; f__Micrococcaceae; g__Rothia; s__uncultured_bacterium	2	2	13	4	4	8	0	0	2	27	1	3	3	2	1	0	2	3	2	1	0	3	0	5	4	1	0	3	4	2	2	1	0	0	5	0	9	1	2	2	3	3	1	1	3	5	3	1
OTU	k__Bacteria; p__Firmicutes; c__Clostridia; o__Clostridiales; f__Lachnospiraceae; g__Blautia; s__uncultured_bacterium	0	0	0	0	0	0	0	0	0	0	0	0	0	0	11	28	3	1	0	15	1	25	6	7	9	12	0	0	0	0	0	0	0	0	0	0	0	0	0	0	5	5	0	5	1	1	17	1
OTU	k__Bacteria; p__Bacteroidetes; c__Bacteroidia; o__Bacteroidales; f__Prevotellaceae; g__Prevotella; s__uncultured_bacterium	0	0	0	0	0	0	0	0	0	1	0	0	0	0	2	25	45	64	41	33	7	11	28	16	48	3	0	0	0	0	0	0	0	0	0	0	0	0	0	0	0	0	0	0	1	1	0	1
OTU	k__Bacteria; p__Bacteroidetes; c__Bacteroidia; o__Bacteroidales; f__Prevotellaceae; g__Paraprevotella; s__uncultured_bacterium	0	0	1	1	1	0	0	0	1	1	0	1	1	0	0	0	0	0	0	0	0	0	0	1	1	0	1289	1812	1498	1652	1638	793	1769	2392	2488	889	1144	1876	54	806	0	194	73	340	173	214	147	67
OTU	k__Bacteria; p__Firmicutes; c__Clostridia; o__Clostridiales; f__Lachnospiraceae; g__Incertae_Sedis; s__uncultured_organism	0	0	0	7	3	0	2	7	2	4	21	30	27	0	0	0	0	0	0	0	0	0	0	0	0	0	0	0	0	0	0	0	0	0	0	0	0	0	1	0	5	8	3	51	14	9	16	51
OTU	k__Bacteria; p__Tenericutes; c__Mollicutes; o__RF9; f__uncultured_bacterium;	20	102	52	146	16	28	27	163	233	2807	69	2	21	246	11	60	4	2	0	25	0	850	2	50	55	14	0	4	0	0	0	0	0	0	0	0	0	0	2	1	0	0	0	0	0	0	0	0
OTU	k__Bacteria; p__Bacteroidetes; c__Bacteroidia; o__Bacteroidales; f__Prevotellaceae; g__Prevotella; s__uncultured_bacterium	0	1	5	0	2	2	0	0	0	6	0	0	29	0	322	258	2470	2868	4301	621	439	157	1339	167	1268	1037	8	3	0	2	0	1	4	0	5	3	2	0	1	0	1	844	462	769	1267	725	428	778
OTU	k__Bacteria; p__Firmicutes; c__Clostridia; o__Clostridiales; f__Lachnospiraceae	0	0	0	0	0	0	0	0	0	0	0	0	0	0	13	18	3	8	0	8	3	103	5	13	8	17	0	0	0	0	0	0	0	0	0	0	0	0	0	0	0	0	0	0	0	0	0	0
OTU	k__Bacteria; p__Firmicutes; c__Clostridia; o__Clostridiales; f__Ruminococcaceae; g__Incertae_Sedis; s__uncultured_bacterium	0	0	0	0	0	0	0	0	0	0	0	0	0	0	37	21	0	4	33	194	0	27	0	111	1	3	0	0	0	0	0	0	0	0	0	0	0	0	0	0	0	0	0	0	0	0	0	0
OTU	k__Bacteria; p__Firmicutes; c__Clostridia; o__Clostridiales; f__Lachnospiraceae; g__Incertae_Sedis	1	3	0	15	17	5	3	8	11	8	9	4	12	6	1	37	1	0	0	2	0	2	0	5	4	12	16	13	18	9	0	0	8	0	7	1	2	3	0	0	2	0	0	0	0	3	0	0
OTU	k__Bacteria; p__Firmicutes; c__Clostridia; o__Clostridiales; f__Peptostreptococcaceae; g__uncultured; s__uncultured_bacterium	9	0	0	3	2	0	1	6	0	2	3	0	1	7	0	0	0	2	0	10	0	0	0	0	1	2	28	7	5	1	1	76	16	6	1	3	19	0	7	2	0	0	0	0	0	0	2	5
OTU	k__Bacteria; p__Firmicutes; c__Erysipelotrichia; o__Erysipelotrichales; f__Erysipelotrichaceae; g__Incertae_Sedis	0	1	1	3	7	19	7	13	9	15	9	5	4	4	1	0	0	0	0	0	0	0	0	0	0	0	15	21	2	26	5	14	31	14	25	1	12	1	11	0	0	0	0	0	0	0	0	0
OTU	k__Bacteria; p__Firmicutes; c__Clostridia; o__Clostridiales; f__Ruminococcaceae; g__Incertae_Sedis; s__uncultured_bacterium	66	106	18	113	242	287	414	532	194	358	394	3	115	57	2	7	52	8	17	36	6	960	12	63	15	66	40	52	24	62	6	10	124	9	96	5	11	92	0	1	16	2	3	8	17	10	61	1
OTU	k__Bacteria; p__Bacteroidetes; c__Bacteroidia; o__Bacteroidales; f__Bacteroidaceae; g__Bacteroides; s__uncultured_bacterium	0	0	0	0	0	0	0	0	0	0	0	0	2	0	799	339	441	462	487	726	184	390	679	512	290	889	0	0	0	0	1	0	0	0	1	0	0	0	1	0	0	0	0	0	0	1	0	0
OTU	k__Bacteria; p__Firmicutes; c__Clostridia; o__Clostridiales; f__Ruminococcaceae; g__Anaerotruncus; s__uncultured_bacterium	0	0	0	0	0	0	0	0	0	0	0	0	0	0	19	29	3	2	1	15	0	1	4	7	5	9	6	13	29	18	0	3	46	0	8	0	0	7	1	0	0	0	0	0	0	0	0	0
OTU	k__Bacteria; p__Firmicutes; c__Clostridia; o__Clostridiales; f__Defluviitaleaceae; g__uncultured; s__uncultured_organism	2	176	188	156	9	40	59	81	214	19	42	36	38	21	1402	97	164	54	143	509	437	417	315	114	241	249	76	100	200	212	392	167	1009	28	74	14	120	183	12	3	576	185	329	219	95	200	395	307
OTU	k__Bacteria; p__Bacteroidetes; c__Bacteroidia; o__Bacteroidales; f__S24-7; g__uncultured_bacterium;	4220	1675	2398	3007	5832	4472	4126	2786	5030	985	4234	609	3807	5681	537	586	75	76	39	393	95	50	235	429	155	392	0	13	15	0	2	1	0	1	4	5	0	1	10	25	0	0	1	1	0	0	1	1
OTU	k__Bacteria; p__Firmicutes; c__Erysipelotrichia; o__Erysipelotrichales; f__Erysipelotrichaceae; g__Incertae_Sedis; s__uncultured_bacterium	317	442	288	375	375	589	673	667	607	2489	353	279	243	379	277	426	72	58	31	302	80	1682	172	687	94	338	1	17	0	1	0	2	0	0	5	2	0	1	3	9	0	143	44	55	17	62	56	147
OTU	k__Bacteria; p__Bacteroidetes; c__Bacteroidia; o__Bacteroidales; f__Rikenellaceae; g__Alistipes	495	314	74	188	608	371	224	342	483	380	162	7	434	534	5	15	1	3	0	3	0	2	1	7	3	24	3	3	0	1	0	0	3	0	1	3	5	0	2	4	1523	1327	923	825	372	847	317	187
OTU	k__Bacteria; p__Firmicutes; c__Clostridia; o__Clostridiales; f__Lachnospiraceae; g__Incertae_Sedis; s__uncultured_bacterium	16	11	3	7	6	15	10	23	26	58	65	32	25	27	12	18	24	3	12	36	28	17	52	176	17	13	51	201	17	59	17	99	126	31	61	21	55	21	24	21	1	5	21	13	23	16	42	9
OTU	k__Bacteria; p__Bacteroidetes; c__Bacteroidia; o__Bacteroidales; f__Prevotellaceae; g__Paraprevotella; s__uncultured_bacterium	0	0	0	0	0	0	0	0	0	0	0	0	0	0	0	0	0	0	0	0	0	0	0	0	0	0	16	1	13	20	23	2	27	32	1	11	19	37	1	7	0	0	0	0	0	0	0	0
OTU	k__Bacteria; p__Firmicutes; c__Clostridia; o__Clostridiales; f__Ruminococcaceae; g__uncultured; s__uncultured_bacterium	11	4	34	23	18	7	6	3	9	8	8	2	23	2	0	0	1	0	0	0	1	0	1	2	2	0	0	1	0	0	0	1	0	0	0	0	0	0	1	0	0	140	0	0	0	0	3	0
OTU	k__Bacteria; p__Bacteroidetes; c__Bacteroidia; o__Bacteroidales; f__Prevotellaceae; g__Alloprevotella; s__uncultured_bacterium	0	0	0	0	0	0	0	0	0	0	0	0	0	0	71	6	94	75	67	51	92	1	47	2	6	1	0	0	0	0	0	0	0	0	0	1	0	0	0	0	0	0	0	0	0	0	0	0
OTU	k__Bacteria; p__Firmicutes; c__Clostridia; o__Clostridiales; f__Peptococcaceae; g__Peptococcus	0	0	0	0	0	0	0	0	0	0	0	0	0	0	0	1	39	39	22	21	0	2	17	12	37	21	0	0	0	0	0	0	0	0	0	0	0	0	0	0	0	0	0	0	0	0	0	0
OTU	k__Bacteria; p__Bacteroidetes; c__Bacteroidia; o__Bacteroidales; f__Prevotellaceae; g__Prevotella; s__uncultured_bacterium	0	0	0	0	0	1	0	0	0	0	0	0	0	0	0	1	1	2	5	1	1	0	0	2	0	0	0	0	0	0	0	0	0	0	0	0	0	0	0	0	0	15	9	16	26	10	14	30
OTU	k__Bacteria; p__Proteobacteria; c__Gammaproteobacteria; o__Enterobacteriales; f__Enterobacteriaceae; g__Enterobacter; s__uncultured_bacterium	987	50	599	234	102	241	552	149	64	989	264	86	202	94	25	109	52	140	30	39	51	1	10	10	8	6	4	34	542	6	13	27	16	5	219	0	27	25	35	5257	0	11	2	64	412	56	58	243
OTU	k__Bacteria; p__Firmicutes; c__Clostridia; o__Clostridiales; f__Ruminococcaceae; g__uncultured; s__uncultured_bacterium	3	21	0	10	7	3	8	15	11	4	4	0	28	11	14	5	6	5	2	5	0	2	3	0	10	4	0	0	1	0	1	0	0	0	0	0	0	0	0	0	10	9	2	4	1	3	15	0
OTU	k__Bacteria; p__Bacteroidetes; c__Bacteroidia; o__Bacteroidales; f__Prevotellaceae; g__Prevotella; s__uncultured_bacterium	0	0	0	0	0	0	0	0	0	0	0	0	0	0	1	0	2	1	2	0	0	0	0	0	1	0	0	0	0	0	0	0	0	0	0	0	0	0	0	0	0	37	16	38	57	29	17	34
OTU	k__Bacteria; p__Firmicutes; c__Clostridia; o__Clostridiales; f__Ruminococcaceae; g__uncultured; s__uncultured_organism	0	0	0	0	0	0	0	0	0	0	0	0	0	0	0	0	0	0	0	0	0	0	0	0	0	0	0	0	0	0	1	0	0	0	0	0	0	0	0	0	0	81	107	9	0	0	0	1
OTU	k__Bacteria; p__Firmicutes; c__Clostridia; o__Clostridiales; f__Lachnospiraceae	31	81	101	117	231	289	574	121	129	17	56	46	82	68	108	2	77	123	125	119	39	11	111	62	125	195	0	0	1	0	0	0	2	0	2	1	0	0	0	0	130	128	86	328	85	868	187	37
OTU	k__Bacteria; p__Firmicutes; c__Clostridia; o__Clostridiales; f__Lachnospiraceae; g__Dorea; s__uncultured_bacterium	55	64	86	63	45	51	41	69	42	122	64	101	32	42	111	167	17	10	18	156	83	486	75	229	54	63	10	115	36	63	17	258	110	37	223	104	48	17	36	11	41	84	47	26	20	7	70	95
OTU	k__Bacteria; p__Bacteroidetes; c__Bacteroidia; o__Bacteroidales; f__Porphyromonadaceae; g__Butyricimonas; s__uncultured_organism	25	35	19	8	7	22	19	12	60	11	15	0	26	24	0	0	0	0	0	0	0	2	0	0	0	0	2	9	28	14	4	0	4	0	10	0	3	7	0	0	251	57	24	21	9	45	19	1
OTU	k__Bacteria; p__Bacteroidetes; c__Bacteroidia; o__Bacteroidales; f__Bacteroidaceae; g__Bacteroides; s__uncultured_bacterium	0	0	0	0	0	0	0	0	0	0	0	0	0	0	0	1	0	0	0	0	0	0	0	0	0	0	1	22	3	0	0	0	8	0	0	4	0	0	0	0	0	61	121	20	20	57	52	0
OTU	k__Bacteria; p__Firmicutes; c__Negativicutes; o__Selenomonadales; f__Veillonellaceae; g__Allisonella; s__uncultured_bacterium	0	0	0	0	0	0	0	0	0	0	0	0	0	0	350	224	42	135	59	95	305	21	42	51	32	67	0	0	0	0	0	0	0	0	0	0	0	0	0	0	0	28	0	0	0	0	0	0
OTU	k__Bacteria; p__Bacteroidetes; c__Bacteroidia; o__Bacteroidales; f__Bacteroidaceae; g__Bacteroides; s__uncultured_bacterium	169	15	2	6	284	5	6	12	9	16	1	8	0	2	4	569	2	0	3	0	1	0	0	0	0	0	41	17	17	5	3	2	1	3	1	18	19	3	0	11	1981	0	0	0	0	0	0	0
OTU	k__Bacteria; p__Bacteroidetes; c__Bacteroidia; o__Bacteroidales; f__Bacteroidaceae; g__Bacteroides; s__uncultured_organism	0	0	0	0	0	0	1	0	0	0	0	0	2	0	0	0	0	0	1	1	0	0	0	0	0	0	46	29	74	82	45	15	17	5	23	7	28	16	6	10	0	122	133	89	53	25	45	12
OTU	k__Bacteria; p__Bacteroidetes; c__Bacteroidia; o__Bacteroidales; f__Bacteroidaceae; g__Bacteroides; s__uncultured_bacterium	0	0	0	0	0	0	0	0	0	0	0	0	1	1	0	0	0	0	0	0	0	0	0	0	0	0	8	13	58	60	14	2	10	0	1	0	2	6	1	3	11	17	9	2	31	27	88	5
OTU	k__Bacteria; p__Firmicutes; c__Clostridia; o__Clostridiales; f__Ruminococcaceae; g__uncultured; s__uncultured_organism	18	15	7	24	32	35	19	40	19	102	17	0	29	21	13	135	1	3	2	16	0	73	15	49	29	65	26	59	39	31	6	4	172	1	169	3	9	17	4	1	201	0	20	2	0	13	14	0
OTU	k__Bacteria; p__Firmicutes; c__Clostridia; o__Clostridiales; f__Lachnospiraceae; g__Incertae_Sedis; s__uncultured_bacterium	0	0	0	0	0	0	0	0	0	0	0	0	0	0	8	3	17	7	3	34	6	39	15	59	14	19	0	0	0	0	0	0	0	0	0	0	0	0	0	0	0	7	2	6	7	13	0	4
OTU	k__Bacteria; p__Bacteroidetes; c__Bacteroidia; o__Bacteroidales; f__Bacteroidaceae; g__Bacteroides; s__uncultured_bacterium	6	6	53	23	10	15	8	2	1	1	32	1	9	2	0	0	0	0	0	0	0	0	0	0	0	0	30	2	32	0	24	18	21	85	0	28	36	43	1	37	0	0	17	2	1	1	0	1
OTU	k__Bacteria; p__Firmicutes; c__Clostridia; o__Clostridiales; f__Ruminococcaceae; g__Anaerotruncus; s__uncultured_bacterium	0	7	1	16	13	6	29	7	12	23	5	2	9	6	0	3	2	7	1	9	1	56	4	13	11	14	0	1	0	0	0	0	0	0	0	0	0	0	0	0	0	0	0	0	0	0	0	0
OTU	k__Bacteria; p__Firmicutes; c__Clostridia; o__Clostridiales; f__Lachnospiraceae	167	131	209	371	237	368	304	337	209	38	589	595	146	182	197	8	62	137	83	128	281	112	311	362	21	55	1837	382	17	71	438	1444	405	583	113	2455	1980	589	595	134	234	58	52	218	770	48	167	545
OTU	k__Bacteria; p__Firmicutes; c__Clostridia; o__Clostridiales; f__Lachnospiraceae; g__uncultured; s__uncultured_organism	0	0	0	0	0	0	0	0	0	0	0	0	0	0	0	0	0	0	0	1	0	0	0	0	0	0	78	617	79	254	99	66	884	27	806	8	38	162	17	27	1	0	0	0	0	0	0	0
OTU	k__Bacteria; p__Firmicutes; c__Clostridia; o__Clostridiales; f__Lachnospiraceae; g__Howardella; s__uncultured_bacterium	0	0	0	0	0	0	0	0	0	0	0	0	1	0	16	33	8	5	11	15	9	84	12	32	21	19	0	0	0	0	0	0	0	0	0	0	0	0	0	0	0	0	0	0	0	0	0	0
OTU	k__Bacteria; p__Bacteroidetes; c__Bacteroidia; o__Bacteroidales; f__Prevotellaceae; g__Prevotella; s__uncultured_bacterium	0	0	0	0	1	0	0	0	0	0	0	0	2	0	56	4	464	106	81	48	18	1	81	3	32	27	0	0	0	0	0	0	0	0	0	0	0	0	0	0	0	0	0	0	0	0	0	0
OTU	k__Bacteria; p__Firmicutes; c__Clostridia; o__Clostridiales; f__Lachnospiraceae; g__Coprococcus	26	30	26	27	21	28	49	34	27	22	66	76	49	35	44	32	44	41	43	66	61	11	110	103	36	37	30	80	17	13	26	33	29	15	14	12	47	32	11	3	0	33	16	42	6	17	28	45
OTU	k__Bacteria; p__Firmicutes; c__Clostridia; o__Clostridiales; f__Christensenellaceae; g__uncultured	86	42	2	23	11	26	49	14	36	6	23	0	14	26	3	37	3	3	4	24	1	5	9	51	6	8	0	2	0	2	0	0	1	0	0	0	0	0	0	0	14	0	0	0	0	0	0	0
OTU	k__Bacteria; p__Firmicutes; c__Negativicutes; o__Selenomonadales; f__Veillonellaceae; g__Megamonas; s__uncultured_bacterium	60	1413	107	680	418	329	737	947	134	6	249	3455	362	463	0	6	0	0	0	0	1	2	2	0	4	3	5	4	3	0	0	0	20	2	16	2	8	0	17	3	0	801	1256	2685	874	2552	7528	8097
OTU	k__Bacteria; p__Firmicutes; c__Clostridia; o__Clostridiales; f__Lachnospiraceae; g__uncultured; s__uncultured_bacterium	13	12	5	5	5	7	16	18	5	9	7	4	3	2	0	0	0	0	1	7	2	13	16	8	6	13	0	0	0	0	0	0	0	0	4	0	9	4	0	0	0	5	0	2	1	4	13	10
OTU	k__Bacteria; p__Firmicutes; c__Clostridia; o__Clostridiales; f__Lachnospiraceae	0	1	31	2	1	5	2	3	1	0	2	4	0	1	5	0	1	1	0	0	11	0	4	26	6	0	6	5	0	1	13	32	21	15	9	54	29	19	36	5	8	0	0	2	2	0	6	8
OTU	k__Bacteria; p__Proteobacteria; c__Gammaproteobacteria; o__Pasteurellales; f__Pasteurellaceae; g__Actinobacillus	0	0	8	2	0	0	1	0	0	0	1	0	0	0	0	0	0	1	2	0	1	1	0	1	0	1	3	2	0	0	0	0	0	3	1	0	0	1	7	1	0	1	0	5	196	1	0	1
OTU	k__Bacteria; p__Bacteroidetes; c__Bacteroidia; o__Bacteroidales; f__Prevotellaceae; g__Prevotella; s__uncultured_bacterium	0	0	0	0	0	0	0	0	0	0	0	0	0	0	9	0	36	23	57	15	12	1	20	2	20	5	0	0	0	0	0	0	0	0	0	0	0	0	0	0	0	0	0	0	0	0	0	0
OTU	k__Bacteria; p__Bacteroidetes; c__Bacteroidia; o__Bacteroidales	3	3	9	20	11	12	5	0	11	1	15	0	9	2	1	0	0	0	0	0	0	0	0	2	0	0	6	1	6	29	19	6	10	0	0	2	8	9	2	1	1	5	11	5	0	6	12	3
OTU	k__Bacteria; p__Firmicutes; c__Negativicutes; o__Selenomonadales; f__Veillonellaceae; g__Veillonella; s__uncultured_bacterium	22	24	61	32	25	8	28	10	53	0	35	15	140	39	1	21	6	0	1	5	0	9	0	2	3	0	159	1101	6	5	20	3	2	23	2	8	21	252	71	1	27	4	3	6	1	1	0	6
OTU	k__Bacteria; p__Firmicutes; c__Clostridia; o__Clostridiales; f__Lachnospiraceae; g__uncultured; s__uncultured_bacterium	138	235	40	145	273	229	37	57	93	87	43	9	82	33	0	0	0	1	0	3	0	0	13	1	5	1	16	6	0	2	15	9	3	0	1	3	2	4	0	1	29	0	0	0	0	0	1	0
OTU	k__Bacteria; p__Firmicutes; c__Clostridia; o__Clostridiales; f__Lachnospiraceae; g__Blautia; s__uncultured_bacterium	171	199	61	72	59	118	169	97	19	9	16	36	18	8	2	55	3	0	2	23	13	38	11	14	14	39	0	0	0	0	0	0	0	0	0	0	0	0	0	0	0	21	0	0	0	1	0	0
OTU	k__Bacteria; p__Bacteroidetes; c__Bacteroidia; o__Bacteroidales; f__Prevotellaceae; g__Prevotella; s__uncultured_bacterium	0	0	0	0	0	0	0	0	0	0	0	0	0	0	1	0	0	1	0	1	2	0	0	0	2	0	0	0	0	0	1	0	0	0	0	0	0	0	0	0	0	83	47	70	109	73	55	67
OTU	k__Bacteria; p__Proteobacteria; c__Betaproteobacteria; o__Burkholderiales; f__Alcaligenaceae; g__Sutterella; s__uncultured_bacterium	0	0	1	0	1	1	1	0	0	1	1	1	2	0	0	1	0	0	1	0	0	0	0	0	2	0	188	75	39	626	830	241	123	1016	115	614	360	808	31	57	0	407	3063	795	1331	863	743	861
OTU	k__Bacteria; p__Bacteroidetes; c__Bacteroidia; o__Bacteroidales; f__Prevotellaceae; g__Prevotella; s__uncultured_bacterium	0	0	0	0	0	0	0	0	0	0	0	0	0	0	62	1	51	17	10	7	26	0	37	2	19	0	0	0	0	0	0	0	0	0	0	0	0	0	0	0	0	0	0	0	0	0	0	0
OTU	k__Bacteria; p__Bacteroidetes; c__Bacteroidia; o__Bacteroidales; f__Prevotellaceae; g__Prevotella; s__uncultured_bacterium	0	0	3	0	0	0	0	0	0	0	0	0	1	0	16	0	2	3	0	1	1	0	0	1	12	3	0	0	0	0	0	1	0	0	0	0	0	0	1	0	0	39	71	48	44	24	74	42
OTU	k__Bacteria; p__Bacteroidetes; c__Bacteroidia; o__Bacteroidales; f__Prevotellaceae; g__uncultured; s__uncultured_bacterium	0	0	0	0	0	0	0	0	0	0	0	0	2	0	107	15	101	129	74	187	65	33	91	77	160	82	0	0	0	1	0	0	0	0	0	0	0	0	0	0	0	0	0	0	0	0	0	0
OTU	k__Bacteria; p__Firmicutes; c__Clostridia; o__Clostridiales; f__Ruminococcaceae; g__uncultured; s__uncultured_bacterium	0	3	0	0	0	1	0	0	0	0	0	0	0	0	2	0	0	1	0	1	0	0	1	0	1	1	6	34	59	130	1	0	8	0	0	0	1	6	1	0	0	0	0	0	0	0	0	0
OTU	k__Bacteria; p__Proteobacteria; c__Betaproteobacteria; o__Burkholderiales; f__Alcaligenaceae; g__Sutterella; s__uncultured_bacterium	0	0	0	0	0	0	0	0	0	0	0	0	0	0	0	0	0	0	0	0	0	0	0	0	0	0	0	0	0	0	1	0	0	0	0	0	0	0	0	0	0	6	1	21	311	134	51	70
OTU	k__Bacteria; p__Firmicutes; c__Clostridia; o__Clostridiales; f__Ruminococcaceae; g__uncultured; s__uncultured_bacterium	257	80	15	83	172	36	36	117	86	371	291	180	190	84	1	21	0	2	1	6	2	80	49	79	18	5	11	294	31	425	35	113	24	18	293	110	318	70	6	15	45	61	1	210	16	73	121	111
OTU	k__Bacteria; p__Bacteroidetes; c__Bacteroidia; o__Bacteroidales; f__Bacteroidaceae; g__Bacteroides; s__uncultured_bacterium	0	0	3	0	1	0	1	0	1	1	1	3	0	0	0	1	0	1	0	0	3	0	0	2	0	1	0	1	1	0	2	1	4	0	5	4	9	2	5	0	0	4	4	5068	2375	3882	4556	1149
OTU	k__Bacteria; p__Firmicutes; c__Clostridia; o__Clostridiales; f__Family_XIII; g__uncultured; s__uncultured_bacterium	0	0	0	0	0	0	0	0	0	0	0	0	1	0	32	3	3	23	10	38	1	6	22	19	25	12	0	0	0	0	0	0	0	0	0	0	0	0	0	0	0	0	0	0	0	0	0	0
OTU	k__Bacteria; p__Firmicutes; c__Clostridia; o__Clostridiales; f__Ruminococcaceae; g__Incertae_Sedis; s__uncultured_bacterium	361	1053	131	708	1383	1241	487	673	1395	125	275	29	1802	902	772	608	532	700	274	735	170	1380	250	516	388	835	3	7	6	2	0	1	1	0	0	1	2	0	3	12	0	461	294	1073	94	619	702	172
OTU	k__Bacteria; p__Bacteroidetes; c__Bacteroidia; o__Bacteroidales; f__Bacteroidaceae; g__Bacteroides	3	1	0	1	250	118	70	139	256	142	330	6	292	154	0	2	0	0	0	0	0	0	0	0	0	1	1	1	1	4	1	1	0	0	0	1	2	0	1	2	4	43	130	2	0	3	76	8
OTU	k__Bacteria; p__Proteobacteria; c__Gammaproteobacteria; o__Pasteurellales; f__Pasteurellaceae; g__Haemophilus; s__uncultured_bacterium	248	46	1655	589	82	158	206	182	277	260	208	504	252	403	20	20	135	84	183	122	122	10	102	53	667	8	125	918	23	8	16	79	2	527	532	274	39	1073	75	23	248	7	7	23	248	10	7	86
OTU	k__Bacteria; p__Bacteroidetes; c__Bacteroidia; o__Bacteroidales; f__Prevotellaceae; g__Prevotella; s__uncultured_bacterium	0	0	0	0	1	0	0	0	0	0	0	0	1	0	0	4	18	19	21	8	6	1	4	1	8	2	0	0	0	0	0	0	0	0	0	1	0	0	1	0	0	43	26	40	65	44	28	43
OTU	k__Bacteria; p__Bacteroidetes; c__Bacteroidia; o__Bacteroidales; f__Prevotellaceae; g__uncultured; s__uncultured_bacterium	0	0	0	0	0	0	0	0	0	0	0	0	0	0	0	0	0	0	0	0	0	0	0	0	0	0	0	0	0	0	0	1	0	0	0	0	0	0	0	0	0	45	0	238	146	82	118	14
OTU	k__Bacteria; p__Bacteroidetes; c__Bacteroidia; o__Bacteroidales; f__Porphyromonadaceae; g__Butyricimonas	37	72	24	44	78	119	149	54	225	45	53	2	97	123	78	21	5	1	2	11	0	23	8	31	5	56	0	0	0	0	0	0	0	0	0	0	0	1	1	2	0	16	23	8	1	18	25	0
OTU	k__Bacteria; p__Firmicutes; c__Erysipelotrichia; o__Erysipelotrichales; f__Erysipelotrichaceae; g__uncultured; s__uncultured_bacterium	1	3	5	4	0	1	0	0	1	0	0	0	2	0	2	0	0	0	0	0	0	0	1	1	0	0	5	4	2	4	13	34	23	17	13	36	37	21	24	1	1	1	1	0	2	0	8	2
OTU	k__Bacteria; p__Bacteroidetes; c__Bacteroidia; o__Bacteroidales; f__Bacteroidaceae; g__Bacteroides; s__uncultured_bacterium	59	27	18	31	31	35	88	42	179	174	38	5	87	61	6	0	1	0	0	2	1	4	2	1	1	2	8	27	16	167	19	3	32	8	88	5	19	17	2	5	150	47	354	22	9	38	71	43
OTU	k__Bacteria; p__Bacteroidetes; c__Bacteroidia; o__Bacteroidales; f__Bacteroidaceae; g__Bacteroides	0	0	0	0	0	0	0	0	0	0	0	0	0	0	0	0	0	0	0	0	0	0	0	0	0	0	0	0	1	4	0	0	0	1	0	0	0	0	0	0	0	46	44	15	5	8	2	2
OTU	k__Bacteria; p__Firmicutes; c__Clostridia; o__Clostridiales; f__Lachnospiraceae; g__Lachnospira; s__uncultured_organism	0	2	32	16	0	6	5	3	1	0	7	5	1	0	0	1	10	3	0	0	0	0	0	0	1	1	1	3	4	10	13	29	13	50	3	30	4	91	2	1	1	1	0	0	0	0	3	1
OTU	k__Bacteria; p__Firmicutes; c__Clostridia; o__Clostridiales; f__Lachnospiraceae; g__Incertae_Sedis; s__uncultured_bacterium	83	158	717	331	116	306	217	210	151	26	493	14	289	28	0	0	0	0	0	0	0	0	0	0	0	0	0	1	0	0	0	1	0	0	1	0	0	1	0	0	2	0	0	0	0	0	0	0
OTU	k__Bacteria; p__Bacteroidetes; c__Bacteroidia; o__Bacteroidales; f__Prevotellaceae; g__Prevotella; s__uncultured_bacterium	0	0	0	0	0	0	0	0	0	0	0	0	0	0	0	0	1	2	1	0	0	0	1	0	0	1	0	0	0	0	0	0	0	0	0	0	0	0	0	0	0	12	11	20	31	22	13	24
OTU	k__Bacteria; p__Bacteroidetes; c__Bacteroidia; o__Bacteroidales; f__Prevotellaceae; g__Prevotella; s__uncultured_bacterium	0	0	1	0	0	0	0	0	0	0	0	0	1	0	4	4	33	23	21	11	15	3	28	3	25	4	0	0	0	0	0	0	0	0	0	0	0	0	0	0	0	0	0	0	0	0	0	0
OTU	k__Bacteria; p__Bacteroidetes; c__Bacteroidia; o__Bacteroidales; f__Rikenellaceae; g__Alistipes; s__uncultured_bacterium	141	42	1	40	177	85	21	81	140	253	71	0	156	211	8	85	1	1	1	8	0	10	4	4	2	18	5	45	21	133	1	3	135	2	62	2	1	19	1	3	66	10	8	2	1	6	10	0
OTU	k__Bacteria; p__Firmicutes; c__Clostridia; o__Clostridiales; f__Lachnospiraceae; g__uncultured; s__uncultured_bacterium	8	1	58	8	2	8	7	1	2	1	5	13	2	1	12	0	0	4	0	1	7	4	7	21	5	0	15	5	1	3	7	40	15	6	10	43	22	12	2	0	6	7	6	8	4	6	16	12
OTU	k__Bacteria; p__Bacteroidetes; c__Bacteroidia; o__Bacteroidales; f__Prevotellaceae; g__Prevotella	0	0	0	0	0	0	0	0	0	0	0	0	0	0	14	0	116	27	49	9	6	0	26	1	35	2	0	0	0	0	0	0	0	0	0	0	0	0	0	0	0	0	0	0	0	0	0	0
OTU	k__Bacteria; p__Firmicutes; c__Clostridia; o__Clostridiales; f__Ruminococcaceae; g__uncultured; s__uncultured_bacterium	0	0	0	0	0	0	0	0	0	0	0	0	0	0	12	3	3	5	10	19	4	28	4	29	11	28	0	9	0	0	0	1	0	0	0	0	0	0	0	0	0	16	0	4	9	4	11	3
OTU	k__Bacteria; p__Firmicutes; c__Bacilli; o__Lactobacillales; f__Streptococcaceae; g__Streptococcus; s__uncultured_bacterium	56	5	170	113	3	3	0	54	1	0	1	7	6	1	151	47	53	35	0	50	0	1	0	1	5	1	8	131	27	1	2	7	18	2	30	1	0	7	0	1	20	52	11	234	35	8	11	2
OTU	k__Bacteria; p__Firmicutes; c__Negativicutes; o__Selenomonadales; f__Veillonellaceae; g__Megamonas; s__uncultured_bacterium	6	72	5	28	19	15	38	40	8	2	17	168	23	30	0	0	0	0	0	0	0	0	0	0	0	0	0	1	0	0	0	0	0	0	0	0	0	0	0	0	0	0	0	3	0	1	1	2
OTU	k__Bacteria; p__Bacteroidetes; c__Bacteroidia; o__Bacteroidales; f__Rikenellaceae; g__Alistipes; s__uncultured_bacterium	3	3	2	15	33	11	8	10	12	15	2	0	26	8	2	2	0	1	0	0	0	5	0	3	2	4	1	3	6	59	10	0	51	0	4	0	3	5	0	0	1	0	0	0	0	1	0	0
OTU	k__Bacteria; p__Bacteroidetes; c__Bacteroidia; o__Bacteroidales; f__Rikenellaceae; g__Alistipes	51	64	3	37	83	48	25	64	175	159	33	0	329	118	12	34	6	3	1	69	0	33	14	57	20	142	0	1	2	0	0	0	0	0	0	0	0	0	0	2	0	8	1	3	2	27	16	0
OTU	k__Bacteria; p__Candidate_division_TM7; c__uncultured_bacterium;	4	3	2	1	3	3	2	2	1	2	3	2	3	1	2	0	0	0	2	3	0	2	1	4	2	2	1	10	3	5	2	2	2	5	41	14	6	2	2	1	1	7	4	6	3	3	1	1
OTU	k__Bacteria; p__Bacteroidetes; c__Bacteroidia; o__Bacteroidales; f__Bacteroidaceae; g__Bacteroides; s__uncultured_bacterium	1	2	4	2	0	2	3	0	0	0	2	0	1	0	0	0	0	0	0	0	0	0	0	0	0	0	13	0	17	0	9	2	12	33	0	20	14	16	0	14	0	0	3	1	0	3	0	0
OTU	k__Bacteria; p__Proteobacteria; c__Betaproteobacteria; o__Burkholderiales; f__Oxalobacteraceae; g__Oxalobacter	4	19	0	18	14	0	0	0	5	1	0	0	87	0	5	2	1	2	0	4	0	74	19	13	25	51	0	1	0	4	0	0	0	0	0	0	0	3	0	0	0	5	0	1	1	3	1	0
OTU	k__Bacteria; p__Firmicutes; c__Clostridia; o__Clostridiales; f__Ruminococcaceae; g__uncultured; s__uncultured_bacterium	0	1	0	1	1	0	1	1	2	2	0	1	0	2	8	4	3	2	2	8	0	22	1	2	7	6	0	36	28	27	8	4	61	2	4	2	1	37	0	1	56	12	2	2	5	18	38	0
OTU	k__Bacteria; p__Firmicutes; c__Clostridia; o__Clostridiales; f__Ruminococcaceae; g__uncultured	0	0	0	0	0	0	0	0	0	0	0	0	0	0	0	0	0	0	0	0	0	0	0	2	1	0	0	1	0	0	0	0	0	0	0	0	1	0	0	0	0	20	3	3	0	9	16	0
OTU	k__Bacteria; p__Bacteroidetes; c__Bacteroidia; o__Bacteroidales; f__Bacteroidaceae; g__Bacteroides; s__uncultured_bacterium	7	4	31	6	0	2	4	1	7	1	18	1	25	2	1	0	0	0	0	0	0	0	0	1	0	0	7	0	7	5	1	0	18	1	0	0	13	15	1	1	36	0	17	0	0	5	11	2
OTU	k__Bacteria; p__Bacteroidetes; c__Bacteroidia; o__Bacteroidales; f__Prevotellaceae; g__Prevotella; s__uncultured_bacterium	0	0	0	0	0	0	0	0	0	0	0	0	1	0	63	0	161	90	110	18	101	0	123	3	96	4	0	0	0	0	0	0	0	0	0	0	0	0	0	0	0	0	0	0	0	0	0	0
OTU	k__Bacteria; p__Actinobacteria; c__Actinobacteria; o__Actinomycetales; f__Actinomycetaceae; g__Actinomyces; s__uncultured_bacterium	4	0	1	4	0	2	1	0	2	0	2	4	2	1	11	8	1	1	1	3	3	3	5	3	3	1	1	6	2	1	5	5	1	8	35	19	16	1	7	4	5	2	6	5	6	2	1	3
OTU	k__Bacteria; p__Firmicutes; c__Clostridia; o__Clostridiales; f__Lachnospiraceae; g__Incertae_Sedis; s__uncultured_bacterium	15	9	1	4	1	18	36	23	5	9	23	4	5	4	76	22	19	7	10	37	46	46	48	107	27	25	17	39	7	7	7	2	11	2	1	10	3	7	0	0	3	33	5	17	43	51	27	16
OTU	k__Bacteria; p__Bacteroidetes; c__Bacteroidia; o__Bacteroidales; f__Prevotellaceae; g__Prevotella; s__uncultured_bacterium	0	0	0	0	0	0	0	0	0	0	0	0	1	0	3	0	25	20	25	2	2	0	9	3	13	2	0	0	0	0	0	0	0	0	0	0	0	0	0	0	0	9	8	9	20	8	4	15
OTU	k__Bacteria; p__Actinobacteria; c__Coriobacteriia; o__Coriobacteriales; f__Coriobacteriaceae; g__uncultured	0	0	0	0	0	0	0	0	0	0	0	0	0	0	0	0	0	0	0	0	0	0	0	0	0	0	0	0	0	0	0	0	0	0	0	0	0	0	0	0	0	7	10	5	10	4	11	2
OTU	k__Bacteria; p__Firmicutes; c__Clostridia; o__Clostridiales; f__Ruminococcaceae; g__uncultured; s__uncultured_bacterium	292	206	16	254	455	392	137	198	173	98	214	39	204	180	166	1246	93	221	68	105	112	108	249	423	197	87	3	98	2	227	3	1	59	1	12	16	26	5	1	1	0	272	97	111	0	220	268	39
OTU	k__Bacteria; p__Firmicutes; c__Clostridia; o__Clostridiales; f__Lachnospiraceae; g__Roseburia; s__uncultured_bacterium	0	0	0	0	2	1	0	4	0	3	1	0	0	0	1	101	0	2	0	32	0	21	13	27	11	1	0	0	0	0	0	0	0	0	0	0	0	0	0	0	0	0	0	0	0	0	0	0
OTU	k__Bacteria; p__Bacteroidetes; c__Bacteroidia; o__Bacteroidales; f__Prevotellaceae; g__uncultured; s__uncultured_bacterium	0	0	0	0	0	0	0	0	0	0	0	1	25	0	616	197	341	497	304	718	185	542	561	596	1164	324	1	0	0	0	0	0	0	0	0	1	0	1	0	0	0	0	0	0	0	0	0	0
OTU	k__Bacteria; p__Bacteroidetes; c__Bacteroidia; o__Bacteroidales; f__Bacteroidaceae; g__Bacteroides; s__uncultured_bacterium	0	0	0	0	0	0	0	0	0	0	0	0	0	0	0	0	0	0	0	0	0	0	0	0	0	0	17	5	21	18	23	3	36	35	0	10	23	30	2	14	0	0	0	2	0	0	0	0
OTU	k__Bacteria; p__Bacteroidetes; c__Bacteroidia; o__Bacteroidales; f__Rikenellaceae; g__Alistipes	404	254	63	164	479	309	178	277	383	256	129	7	392	430	4	2	0	0	0	3	0	1	2	5	3	13	0	1	0	3	0	0	0	0	1	1	0	2	0	3	10	1	2	3	2	8	7	0
OTU	k__Bacteria; p__Firmicutes; c__Clostridia; o__Clostridiales; f__Lachnospiraceae; g__Incertae_Sedis; s__uncultured_bacterium	0	0	0	5	5	0	3	11	1	3	11	30	26	3	0	0	0	0	0	0	0	0	1	0	0	0	0	0	0	0	2	44	4	37	4	5	10	18	32	3	7	8	4	61	12	6	15	43
OTU	k__Bacteria; p__Firmicutes; c__Clostridia; o__Clostridiales; f__Lachnospiraceae; g__Coprococcus; s__uncultured_bacterium	16	62	20	42	22	34	87	66	20	3	31	9	14	41	0	0	0	0	0	0	0	0	0	0	0	0	0	0	0	0	0	0	0	0	0	0	0	0	0	0	0	0	0	0	0	0	0	0
OTU	k__Bacteria; p__Proteobacteria; c__Betaproteobacteria; o__Burkholderiales; f__Alcaligenaceae; g__Parasutterella; s__uncultured_bacterium	1298	721	305	537	326	593	563	563	1262	38	1382	300	218	458	2533	207	928	1212	1234	494	2715	13	2430	505	956	1431	0	2	0	2	0	4	2	1	2	0	1	0	1	6	736	12	8	15	15	71	114	94
OTU	k__Bacteria; p__Firmicutes; c__Clostridia; o__Clostridiales; f__Ruminococcaceae; g__uncultured; s__uncultured_bacterium	390	829	63	281	357	384	376	202	578	214	225	15	410	244	92	1905	270	387	142	945	62	485	458	707	321	1472	2	44	3	41	4	7	150	3	16	24	7	18	3	1	0	266	111	79	19	56	66	13
OTU	k__Bacteria; p__Firmicutes; c__Clostridia; o__Clostridiales; f__Peptostreptococcaceae; g__uncultured; s__uncultured_bacterium	74	3	45	24	61	96	182	95	35	581	79	20	123	110	0	94	0	9	0	9	3	1	7	27	3	70	156	332	18	53	81	166	19	360	553	54	177	14	5	11	44	1	0	3	2	9	11	8
OTU	k__Bacteria; p__Firmicutes; c__Clostridia; o__Clostridiales; f__Lachnospiraceae	23	54	867	21	25	29	23	21	68	167	128	235	31	181	69	55	6	6	3	24	8	71	20	55	11	29	3	51	6	27	29	159	27	83	66	123	74	29	51	16	25	60	2	17	20	42	77	32
OTU	k__Bacteria; p__Firmicutes; c__Clostridia; o__Clostridiales; f__Ruminococcaceae; g__uncultured; s__uncultured_bacterium	151	84	50	111	324	85	92	74	310	109	118	66	191	38	22	13	27	45	4	91	5	91	53	236	32	103	0	1	1	0	0	0	0	0	1	1	0	0	0	3	0	16	4	17	8	10	9	7
OTU	k__Bacteria; p__Firmicutes; c__Clostridia; o__Clostridiales; f__Lachnospiraceae; g__uncultured; s__uncultured_bacterium	80	133	99	58	133	201	207	144	123	15	278	376	196	112	23	8	34	20	21	40	25	3	42	117	23	12	0	2	0	0	27	134	112	101	21	50	258	73	7	33	72	61	0	0	26	56	129	69
OTU	k__Bacteria; p__Actinobacteria; c__Actinobacteria; o__Bifidobacteriales; f__Bifidobacteriaceae; g__Bifidobacterium; s__uncultured_bacterium	34	97	6	92	250	282	385	335	169	434	180	115	108	210	5	40	3	6	20	67	29	190	19	192	26	129	0	6	1	0	0	11	0	1	5	1	1	1	7	3	240	21	340	14	4	38	9	9
OTU	k__Bacteria; p__Firmicutes; c__Clostridia; o__Clostridiales; f__Lachnospiraceae; g__Incertae_Sedis; s__uncultured_bacterium	1034	2195	4400	1571	792	1058	1272	1006	826	1083	1494	2317	1020	608	197	667	589	89	16	1170	319	177	221	95	1277	24	4	27	0	0	1	1	2	0	5	2	2	1	3	11	7	964	2	1279	359	1192	858	556
OTU	k__Bacteria; p__Firmicutes; c__Clostridia; o__Clostridiales; f__Lachnospiraceae; g__uncultured; s__uncultured_organism	4	71	79	41	16	15	46	31	5	1	23	114	9	15	122	2	90	53	60	38	59	1	56	6	138	21	0	0	0	0	0	0	1	0	1	0	2	1	0	1	85	53	103	78	52	56	81	61
OTU	k__Bacteria; p__Firmicutes; c__Clostridia; o__Clostridiales; f__Ruminococcaceae; g__Ruminococcus; s__uncultured_bacterium	0	0	0	0	0	0	0	0	0	0	0	0	0	0	0	0	0	0	0	0	0	0	0	0	0	0	2	0	0	0	0	0	0	0	0	0	0	0	0	0	0	298	0	0	2	139	464	0
OTU	k__Bacteria; p__Actinobacteria; c__Coriobacteriia; o__Coriobacteriales; f__Coriobacteriaceae; g__uncultured; s__uncultured_bacterium	168	97	13	151	280	283	126	330	153	219	441	90	114	571	0	0	0	0	1	2	0	0	0	0	0	2	0	0	3	0	0	0	0	0	0	0	0	0	0	1	0	0	0	0	0	0	0	1
OTU	k__Bacteria; p__Bacteroidetes; c__Bacteroidia; o__Bacteroidales; f__Bacteroidaceae; g__Bacteroides	15	12	115	64	9	17	10	2	35	4	39	1	24	5	12	0	0	0	0	0	0	0	0	0	1	0	41	7	145	163	96	24	209	106	2	28	49	75	11	22	219	6	6	2	1	1	6	0
OTU	k__Bacteria; p__Firmicutes; c__Clostridia; o__Clostridiales; f__Defluviitaleaceae; g__Incertae_Sedis; s__uncultured_bacterium	1	31	14	1	0	0	0	0	0	0	0	0	0	0	0	0	0	0	0	0	0	0	0	0	0	0	0	2	0	0	0	2	0	0	0	0	0	0	0	0	122	0	0	0	0	0	0	0
OTU	k__Bacteria; p__Bacteroidetes; c__Bacteroidia; o__Bacteroidales; f__Prevotellaceae; g__Prevotella; s__uncultured_bacterium	0	0	1	0	0	0	1	0	0	1	0	0	0	0	0	0	1	1	0	0	0	0	0	0	0	0	0	0	0	0	0	0	0	0	0	0	0	0	0	0	0	42	25	44	66	47	15	47
OTU	k__Bacteria; p__Bacteroidetes; c__Bacteroidia; o__Bacteroidales; f__Bacteroidaceae; g__Bacteroides	0	0	0	0	0	0	0	0	0	0	0	0	0	0	0	0	0	0	0	0	0	0	0	0	0	0	18	5	23	14	10	4	56	32	2	5	6	24	1	6	0	0	0	0	1	1	1	0
OTU	k__Bacteria; p__Firmicutes; c__Clostridia; o__Clostridiales; f__Lachnospiraceae; g__Pseudobutyrivibrio	0	0	0	0	4	11	5	8	3	39	36	58	13	6	0	0	0	0	0	0	0	0	0	0	0	0	0	0	0	0	0	0	0	0	0	0	0	0	0	0	6	0	0	0	0	0	0	0
OTU	k__Bacteria; p__Bacteroidetes; c__Bacteroidia; o__Bacteroidales; f__Porphyromonadaceae; g__Butyricimonas; s__uncultured_organism	7	6	5	3	13	4	6	7	26	3	4	0	6	12	0	0	0	0	0	0	0	0	0	0	0	0	11	25	27	39	15	2	32	2	24	2	3	21	1	0	216	27	21	12	3	18	8	0
OTU	k__Bacteria; p__Bacteroidetes; c__Bacteroidia; o__Bacteroidales; f__Bacteroidaceae; g__Bacteroides; s__uncultured_bacterium	0	2	2	6	2	4	6	1	2	0	9	0	9	1	0	0	0	0	0	0	0	0	0	0	0	0	54	0	23	0	14	15	34	45	0	5	15	41	0	13	0	0	6	1	1	0	6	1
OTU	k__Bacteria; p__Firmicutes; c__Clostridia; o__Clostridiales; f__Christensenellaceae; g__uncultured; s__uncultured_bacterium	0	0	0	0	0	0	0	0	0	0	0	0	1	0	1	2	10	12	0	38	0	0	12	24	9	256	0	0	0	0	0	0	0	0	0	0	0	0	0	0	0	1	0	0	0	22	24	0
OTU	k__Bacteria; p__Firmicutes; c__Clostridia; o__Clostridiales; f__Lachnospiraceae; g__Pseudobutyrivibrio; s__uncultured_bacterium	0	0	0	0	0	0	0	0	0	0	0	0	0	0	0	0	0	0	0	0	0	0	0	0	0	0	23	1	0	1	29	19	6	5	1	0	12	23	63	24	0	0	0	0	0	0	0	0
OTU	k__Bacteria; p__Firmicutes; c__Negativicutes; o__Selenomonadales; f__Acidaminococcaceae; g__Phascolarctobacterium; s__uncultured_bacterium	1	2	10	2	0	0	0	0	0	0	1	0	4	0	27	1	0	0	0	0	2	0	2	1	4	0	14	2	4	7	24	9	20	20	0	8	24	27	4	5	2	0	0	4	0	0	16	3
OTU	k__Bacteria; p__Bacteroidetes; c__Bacteroidia; o__Bacteroidales; f__Prevotellaceae; g__Prevotella; s__uncultured_bacterium	0	0	0	0	0	0	0	0	0	0	0	0	0	0	1	0	2	0	0	0	0	0	0	0	0	0	0	0	0	0	0	0	0	0	0	0	0	0	0	0	0	33	23	29	45	29	17	40
OTU	k__Bacteria; p__Firmicutes; c__Clostridia; o__Clostridiales; f__Ruminococcaceae; g__uncultured; s__uncultured_bacterium	0	0	0	0	1	0	0	0	0	0	0	0	1	0	0	4	0	0	0	0	0	0	0	0	0	0	2	1	0	0	0	0	0	0	0	0	0	0	0	0	0	554	0	0	0	0	0	0
OTU	k__Bacteria; p__Firmicutes; c__Clostridia; o__Clostridiales; f__Ruminococcaceae; g__Incertae_Sedis; s__uncultured_bacterium	70	42	38	36	22	41	16	60	13	207	111	32	82	36	0	1	0	0	0	0	0	0	0	0	0	0	0	1	1	1	0	0	0	0	0	0	2	3	0	1	14	19	37	11	29	16	10	3
OTU	k__Bacteria; p__Firmicutes; c__Clostridia; o__Clostridiales; f__Clostridiaceae_1; g__Clostridium_sensu_stricto_1; s__uncultured_bacterium	169	0	10	68	75	78	1	22	7	13	1	0	12	2	0	19	10	68	10	76	2	0	236	0	0	2	286	318	6	36	1	812	5	0	1	22	7	0	39	0	1	1	0	33	4	6	2	14
OTU	k__Bacteria; p__Firmicutes; c__Erysipelotrichia; o__Erysipelotrichales; f__Erysipelotrichaceae; g__Turicibacter; s__uncultured_bacterium	49	0	4	40	0	3	35	27	17	1	3	45	79	112	1	2	1	145	6	15	4	1	5	63	1	23	0	0	0	1	0	90	12	666	1	54	3	3	56	1	1	8	0	37	0	0	2	193
OTU	k__Bacteria; p__Actinobacteria; c__Actinobacteria; o__Bifidobacteriales; f__Bifidobacteriaceae; g__Bifidobacterium; s__uncultured_bacterium	0	0	0	0	0	0	0	0	0	0	0	0	1	0	0	10	2	0	4	24	5	45	2	54	8	29	0	0	0	0	0	0	0	0	0	0	0	0	2	0	19	3	49	0	0	6	6	1
OTU	k__Bacteria; p__Firmicutes; c__Clostridia; o__Clostridiales; f__Lachnospiraceae	15	7	6	2	4	3	3	10	4	8	0	15	0	6	1	2	1	0	0	7	1	22	5	28	2	1	0	5	0	0	4	35	3	7	11	12	11	22	1	1	0	15	1	2	3	0	2	7
OTU	k__Bacteria; p__Firmicutes; c__Clostridia; o__Clostridiales; f__Ruminococcaceae; g__uncultured; s__uncultured_bacterium	0	0	0	0	0	0	0	0	0	0	0	0	0	0	7	7	27	7	7	41	7	116	34	28	12	11	0	0	0	0	0	0	0	0	1	0	0	0	0	0	0	0	0	0	0	0	0	0
OTU	k__Bacteria; p__Bacteroidetes; c__Bacteroidia; o__Bacteroidales; f__Prevotellaceae; g__uncultured; s__uncultured_bacterium	0	0	0	0	0	0	0	0	0	0	0	0	6	0	75	56	270	456	768	886	212	72	428	865	561	1581	0	0	0	0	0	0	1	0	0	2	0	0	0	1	0	0	0	0	0	0	1	0
OTU	k__Bacteria; p__Firmicutes; c__Clostridia; o__Clostridiales; f__Ruminococcaceae; g__uncultured; s__uncultured_bacterium	0	0	0	0	0	0	0	0	0	0	0	0	0	1	50	499	26	90	7	105	0	206	50	728	23	877	0	1	0	0	0	0	0	0	0	0	0	0	0	0	0	0	0	0	0	0	0	1
OTU	k__Bacteria; p__Firmicutes; c__Clostridia; o__Clostridiales; f__Lachnospiraceae; g__uncultured; s__uncultured_bacterium	1	0	1	0	0	0	0	0	0	0	0	0	0	0	0	0	0	0	0	0	0	0	0	0	0	0	0	1	2	49	34	214	107	22	39	149	566	186	1	2	0	0	0	0	3	0	0	0
OTU	k__Bacteria; p__Firmicutes; c__Clostridia; o__Clostridiales; f__Lachnospiraceae; g__Coprococcus	13	4	6	2	2	2	4	2	2	0	3	3	1	5	13	3	7	12	8	16	10	6	6	21	15	7	0	0	0	0	0	1	0	0	1	1	0	0	0	0	6	6	1	16	2	4	16	3
OTU	k__Bacteria; p__Bacteroidetes; c__Bacteroidia; o__Bacteroidales; f__Prevotellaceae; g__Prevotella; s__uncultured_bacterium	0	0	1	0	0	0	1	0	0	0	0	0	2	0	0	0	0	0	0	0	0	0	0	0	0	0	0	0	0	0	0	1	1	0	0	1	0	0	0	0	0	14	27	14	27	19	48	28
OTU	k__Bacteria; p__Actinobacteria; c__Coriobacteriia; o__Coriobacteriales; f__Coriobacteriaceae; g__Collinsella; s__uncultured_bacterium	172	94	33	50	84	100	174	69	100	1016	125	228	73	213	84	114	21	21	5	88	31	268	90	414	30	155	114	360	61	181	82	355	403	681	6539	832	226	84	749	118	0	95	72	160	104	87	174	107
OTU	k__Bacteria; p__Proteobacteria; c__Betaproteobacteria; o__Burkholderiales; f__Alcaligenaceae; g__Sutterella; s__uncultured_bacterium	0	0	10	1169	2537	2407	1887	2239	601	27	2641	1300	766	1452	1022	109	1642	1638	1711	1656	1977	15	1599	360	829	570	0	1	4	0	0	5	0	0	1	2	0	1	7	1	532	0	0	0	0	0	3	0
OTU	k__Bacteria; p__Bacteroidetes; c__Bacteroidia; o__Bacteroidales; f__Bacteroidaceae; g__Bacteroides; s__uncultured_bacterium	2	0	12	10	4	5	2	3	5	0	11	0	10	0	0	0	0	0	0	0	0	0	0	0	0	0	2	0	15	24	6	1	37	1	3	0	2	20	0	0	18	1	2	0	0	1	4	1
OTU	k__Bacteria; p__Bacteroidetes; c__Bacteroidia; o__Bacteroidales; f__Bacteroidaceae; g__Bacteroides; s__uncultured_bacterium	1075	683	1744	1070	1029	905	619	362	776	110	249	311	435	506	0	27	2	0	0	1	0	1	1	0	1	3	1520	109	1046	1479	636	707	478	614	81	185	370	245	270	368	0	2629	4203	564	925	354	155	150
OTU	k__Bacteria; p__Firmicutes; c__Clostridia; o__Clostridiales; f__Lachnospiraceae; g__Incertae_Sedis; s__uncultured_bacterium	434	640	420	539	236	243	440	359	262	97	270	1263	644	178	2232	879	1112	669	646	1254	1515	391	692	711	1441	1006	58	71	47	33	22	54	58	19	28	11	71	42	2	1	244	674	648	958	851	535	1296	980
OTU	k__Bacteria; p__Actinobacteria; c__Actinobacteria; o__Bifidobacteriales; f__Bifidobacteriaceae; g__Bifidobacterium; s__uncultured_bacterium	40	70	7	31	125	91	123	123	115	222	120	88	70	154	0	1	0	0	0	0	0	0	1	0	0	1	0	2	1	0	0	4	0	0	0	0	1	0	1	1	148	25	291	2	3	15	7	18
OTU	k__Bacteria; p__Firmicutes; c__Clostridia; o__Clostridiales; f__Ruminococcaceae; g__Anaerotruncus; s__uncultured_bacterium	0	0	0	0	0	0	0	0	0	2	0	0	5	0	302	26	158	204	71	317	52	30	200	161	126	70	8	64	10	66	0	14	0	0	29	2	12	34	2	1	4	0	0	2	0	0	0	0
OTU	k__Bacteria; p__Bacteroidetes; c__Bacteroidia; o__Bacteroidales; f__Porphyromonadaceae; g__Parabacteroides	31	28	14	19	29	19	7	10	15	11	13	0	37	27	72	19	1	1	1	8	0	3	3	9	9	41	0	1	1	0	0	0	0	0	0	0	0	0	0	1	0	0	0	0	0	0	1	1
OTU	k__Bacteria; p__Proteobacteria; c__Betaproteobacteria; o__Neisseriales; f__Neisseriaceae; g__Neisseria; s__uncultured_bacterium	4	1	6	6	3	5	0	2	1	3	2	4	8	2	11	5	5	3	3	2	1	4	3	7	9	4	1	1	1	2	0	3	0	3	3	2	3	7	21	3	5	0	3	4	8	3	3	1
OTU	k__Bacteria; p__Bacteroidetes; c__Bacteroidia; o__Bacteroidales; f__Prevotellaceae; g__Prevotella; s__uncultured_bacterium	0	0	0	0	0	0	0	0	0	1	0	0	1	0	58	5	122	39	70	22	38	4	72	12	108	11	0	0	0	0	0	0	0	0	0	0	0	0	0	0	0	2	0	2	0	1	2	1
OTU	k__Bacteria; p__Firmicutes; c__Clostridia; o__Clostridiales; f__Ruminococcaceae; g__uncultured; s__uncultured_bacterium	96	298	96	190	253	275	181	93	213	4	77	85	159	50	192	41	234	220	172	201	64	24	139	248	158	139	5	9	8	120	9	64	23	8	12	19	7	46	0	1	0	240	264	141	29	149	121	85
OTU	k__Bacteria; p__Firmicutes; c__Clostridia; o__Clostridiales; f__Lachnospiraceae; g__Coprococcus; s__uncultured_bacterium	172	809	164	27	6	15	16	14	27	99	27	20	17	93	118	672	72	545	90	368	33	1378	261	307	318	224	0	17	0	0	0	1	1	0	12	2	1	1	0	0	4	1	0	0	0	0	0	0
OTU	k__Bacteria; p__Firmicutes; c__Bacilli; o__Lactobacillales; f__Streptococcaceae; g__Streptococcus; s__uncultured_bacterium	12	7	33	42	55	26	28	36	61	96	16	22	13	14	13	92	13	4	5	20	7	38	6	25	7	11	5	25	2	7	2	11	5	24	64	31	31	25	23	6	7	20	17	12	24	10	4	15
OTU	k__Bacteria; p__Firmicutes; c__Clostridia; o__Clostridiales; f__Ruminococcaceae; g__uncultured; s__uncultured_bacterium	17	7	1	15	1	4	19	1	15	5	9	2	19	10	5	39	8	74	5	11	2	8	9	40	12	17	2	13	1	19	1	1	142	1	19	3	0	5	1	0	38	42	1	22	1	41	14	2
OTU	k__Bacteria; p__Bacteroidetes; c__Bacteroidia; o__Bacteroidales; f__Rikenellaceae; g__Alistipes; s__uncultured_bacterium	2495	1672	852	1303	2940	2380	1263	1829	3372	2363	1045	22	2239	1814	20	7	2	3	3	8	1	5	5	9	2	23	133	174	217	972	120	72	978	122	361	44	128	455	9	29	0	0	0	1	84	1874	1705	529
OTU	k__Bacteria; p__Firmicutes; c__Clostridia; o__Clostridiales; f__Ruminococcaceae; g__uncultured; s__uncultured_bacterium	1399	1848	245	634	622	535	1002	2392	1961	1042	527	28	41	604	2179	16467	498	996	605	2057	1891	4644	1903	8788	2362	3699	2	36	1	2	1	3	0	0	5	3	3	0	4	10	2	1	0	0	0	0	0	0
OTU	k__Bacteria; p__Bacteroidetes; c__Bacteroidia; o__Bacteroidales; f__Bacteroidaceae; g__Bacteroides; s__uncultured_bacterium	5	5	38	27	17	30	15	6	9	0	37	2	29	9	0	0	0	0	0	0	0	0	0	0	0	0	0	0	0	0	0	0	0	0	0	0	0	0	0	0	0	0	0	0	0	0	0	0
OTU	k__Bacteria; p__Firmicutes; c__Clostridia; o__Clostridiales; f__Lachnospiraceae; g__Roseburia; s__uncultured_bacterium	19	57	15	96	18	57	47	80	64	34	167	949	67	167	16	10	35	8	19	29	27	46	69	64	45	32	0	125	52	31	48	12	102	3	5	4	29	46	0	1	73	0	0	0	42	2	63	0
OTU	k__Bacteria; p__Bacteroidetes; c__Bacteroidia; o__Bacteroidales; f__Prevotellaceae; g__Prevotella; s__uncultured_organism	0	0	1	0	0	0	0	1	0	0	0	0	1	0	672	7	48	52	21	54	192	2	133	69	41	55	0	1	0	0	0	0	0	0	0	0	0	0	0	0	0	0	0	0	0	0	0	0
OTU	k__Bacteria; p__Firmicutes; c__Clostridia; o__Clostridiales; f__Christensenellaceae; g__uncultured; s__uncultured_bacterium	228	2060	455	744	2125	847	1705	1480	1234	3553	1964	270	2123	1066	23	85	15	96	6	62	5	382	33	89	36	129	0	31	4	0	0	1	2	1	3	2	1	0	3	7	1	0	0	0	0	0	0	1
OTU	k__Bacteria; p__Bacteroidetes; c__Bacteroidia; o__Bacteroidales; f__Bacteroidaceae; g__Bacteroides; s__uncultured_bacterium	2235	1945	988	3762	1742	2036	1291	3236	3045	4662	2475	181	2859	2836	482	157	16	76	6	41	5	19	13	471	13	45	233	3007	4049	5976	1647	657	6113	1937	504	779	630	1360	79	181	3393	571	523	235	136	891	583	70
OTU	k__Bacteria; p__Bacteroidetes; c__Bacteroidia; o__Bacteroidales; f__Rikenellaceae; g__Alistipes; s__uncultured_bacterium	2	4	1	3	6	3	2	8	2	5	1	0	2	9	30	349	7	9	10	265	5	170	81	324	51	846	0	2	1	10	0	0	7	0	1	0	0	2	2	0	28	1	1	0	0	1	0	0
OTU	k__Bacteria; p__Firmicutes; c__Negativicutes; o__Selenomonadales; f__Veillonellaceae; g__Megamonas; s__uncultured_bacterium	0	1	4	7	0	1	1	0	0	0	3	10	2	1	0	0	0	0	0	0	0	0	0	0	0	0	0	0	0	0	0	0	0	0	0	0	0	0	1	1	0	0	2	11	4	8	97	58
OTU	k__Bacteria; p__Bacteroidetes; c__Bacteroidia; o__Bacteroidales; f__S24-7; g__uncultured_bacterium;	9	67	4	119	33	8	2	2	40	28	2	2	109	33	0	0	0	0	0	0	0	0	0	0	0	0	0	1	0	0	0	0	0	0	0	0	0	0	0	0	0	0	0	0	0	0	0	0
OTU	k__Bacteria; p__Firmicutes; c__Clostridia; o__Clostridiales; f__Ruminococcaceae; g__Subdoligranulum; s__uncultured_bacterium	403	406	150	239	163	240	291	298	745	1964	533	361	230	739	1183	1412	214	400	174	371	554	3283	686	1441	833	822	151	932	204	151	22	156	76	74	929	60	288	187	48	9	2	1155	1951	675	497	302	1311	1156
OTU	k__Bacteria; p__Firmicutes; c__Clostridia; o__Clostridiales; f__Ruminococcaceae; g__uncultured; s__uncultured_bacterium	10	2	14	13	4	9	10	1	6	0	3	3	2	1	5	1	10	7	10	6	1	0	3	1	0	3	2	0	2	19	6	21	11	7	4	6	1	18	0	0	0	2	5	12	6	15	7	3
OTU	k__Bacteria; p__Bacteroidetes; c__Bacteroidia; o__Bacteroidales; f__Prevotellaceae; g__Alloprevotella; s__uncultured_bacterium	0	0	0	0	0	0	0	0	0	0	0	0	0	0	30	1	60	41	52	7	20	0	57	0	49	1	0	0	0	0	0	0	0	0	0	0	0	0	0	0	0	0	0	0	0	0	0	0
OTU	k__Bacteria; p__Bacteroidetes; c__Bacteroidia; o__Bacteroidales; f__Porphyromonadaceae; g__Parabacteroides; s__uncultured_bacterium	14	10	1	3	9	6	4	14	4	3	3	0	18	10	0	0	0	0	0	0	0	0	0	0	0	0	1	8	0	0	0	0	0	0	0	0	0	0	0	1	0	30	107	1	1	5	37	0
OTU	k__Bacteria; p__Bacteroidetes; c__Bacteroidia; o__Bacteroidales; f__Porphyromonadaceae; g__Parabacteroides; s__uncultured_bacterium	0	0	0	0	0	0	0	0	0	0	0	0	0	1	42	33	13	26	15	38	5	25	35	83	20	51	0	0	0	0	0	0	0	0	0	0	0	0	0	0	0	1	0	0	0	0	0	0
OTU	k__Bacteria; p__Tenericutes; c__Mollicutes; o__RF9; f__uncultured_bacterium;	0	0	0	0	0	0	0	0	0	0	1	0	0	0	0	0	0	0	0	0	1	0	0	0	0	0	0	0	0	0	0	1	0	0	0	1	0	0	0	0	0	94	0	0	0	737	400	0
OTU	k__Bacteria; p__Firmicutes; c__Clostridia; o__Clostridiales; f__Peptostreptococcaceae; g__uncultured; s__uncultured_bacterium	0	0	0	0	0	0	0	0	0	0	0	0	0	0	0	0	0	0	0	0	0	0	0	0	0	1	141	955	68	206	245	2473	333	389	556	118	394	129	1118	331	2	0	0	0	8	0	0	0
OTU	k__Bacteria; p__Firmicutes; c__Clostridia; o__Clostridiales	0	3	28	2	1	3	3	3	1	0	8	14	2	0	3	0	1	2	0	1	4	0	2	4	5	0	1	1	0	0	3	15	12	7	6	22	18	10	2	0	9	0	0	2	0	0	7	3
OTU	k__Bacteria; p__Bacteroidetes; c__Bacteroidia; o__Bacteroidales; f__Bacteroidaceae; g__Bacteroides; s__uncultured_bacterium	0	0	0	0	0	0	0	0	0	0	0	0	0	0	0	0	0	0	0	0	0	0	0	0	0	0	0	0	0	0	0	0	0	1	1	0	0	0	0	0	0	0	0	51	52	32	81	18
OTU	k__Bacteria; p__Proteobacteria; c__Gammaproteobacteria; o__Pasteurellales; f__Pasteurellaceae; g__Haemophilus	8	2	37	60	57	36	10	19	104	51	10	13	85	85	0	0	0	0	0	0	0	0	0	0	1	0	1	3	0	0	0	2	0	7	5	14	1	1	1	1	0	0	0	2	18	1	0	0
OTU	k__Bacteria; p__Bacteroidetes; c__Bacteroidia; o__Bacteroidales; f__Bacteroidaceae; g__Bacteroides; s__uncultured_organism	0	0	0	1	0	0	0	0	0	0	0	0	0	0	0	0	0	0	0	0	0	0	0	0	0	0	0	1	0	0	0	0	0	0	0	0	0	0	0	0	0	32	36	20	8	7	2	1
OTU	k__Bacteria; p__Bacteroidetes; c__Bacteroidia; o__Bacteroidales; f__Prevotellaceae; g__uncultured; s__uncultured_bacterium	0	0	0	0	0	0	0	0	0	0	0	0	0	0	3	0	18	25	79	8	7	0	27	11	42	12	0	0	0	0	0	0	0	0	0	0	0	0	0	0	0	0	0	0	0	0	0	0
OTU	k__Bacteria; p__Bacteroidetes; c__Bacteroidia; o__Bacteroidales; f__Bacteroidaceae; g__Bacteroides; s__uncultured_bacterium	4	5	32	23	5	5	6	3	13	1	16	1	16	3	0	0	0	0	0	0	0	0	0	0	0	1	108	4	83	73	79	17	49	47	2	6	107	100	18	41	64	2	31	2	1	0	0	0
OTU	k__Bacteria; p__Bacteroidetes; c__Bacteroidia; o__Bacteroidales; f__Prevotellaceae; g__Prevotella; s__uncultured_bacterium	0	0	2	0	0	0	0	0	0	0	0	0	0	0	7	2	3	3	12	1	5	0	2	1	12	1	1	0	0	0	0	0	0	0	1	0	1	0	1	0	0	164	65	108	164	67	65	219
OTU	k__Bacteria; p__Bacteroidetes; c__Bacteroidia; o__Bacteroidales; f__Prevotellaceae; g__Prevotella; s__uncultured_bacterium	0	0	0	0	0	0	0	0	0	0	0	0	0	0	0	1	1	0	1	0	0	0	1	0	1	0	0	0	0	0	0	0	0	0	0	0	0	0	0	0	0	32	31	43	48	30	16	32
OTU	k__Bacteria; p__Firmicutes; c__Clostridia; o__Clostridiales; f__Ruminococcaceae; g__uncultured; s__uncultured_organism	7	10	9	18	4	15	14	9	3	6	14	1	13	7	24	10	3	7	4	2	4	9	2	11	3	13	8	13	3	10	15	3	10	3	4	0	2	10	0	2	13	10	18	13	11	4	15	3
OTU	k__Bacteria; p__Bacteroidetes; c__Bacteroidia; o__Bacteroidales; f__Prevotellaceae; g__Prevotella; s__uncultured_bacterium	2	0	95	9	12	9	13	5	2	19	3	43	338	4	4044	5371	23678	26103	30803	10490	4539	2482	13718	3581	16477	8856	85	15	3	10	14	26	64	5	82	22	62	9	32	8	8	23878	12729	22727	34607	21275	12373	22791
OTU	k__Bacteria; p__Firmicutes; c__Clostridia; o__Clostridiales; f__Defluviitaleaceae; g__uncultured; s__uncultured_bacterium	0	3	13	1	0	0	1	0	0	0	0	0	2	0	40	0	0	0	1	0	11	0	6	0	7	0	0	0	2	2	12	3	21	2	0	0	3	7	0	0	5	0	0	1	2	2	10	6
OTU	k__Bacteria; p__Bacteroidetes; c__Bacteroidia; o__Bacteroidales; f__Bacteroidaceae; g__Bacteroides	0	0	0	0	0	0	0	0	0	0	0	0	0	0	0	0	0	0	0	0	0	0	0	0	0	0	1	0	0	0	0	0	0	0	0	0	0	0	0	0	0	64	18	62	67	34	38	60
OTU	k__Bacteria; p__Firmicutes; c__Clostridia; o__Clostridiales; f__Ruminococcaceae; g__Subdoligranulum; s__uncultured_bacterium	109	134	60	210	58	39	97	60	159	276	242	433	89	67	71	226	23	92	41	50	81	370	73	133	170	164	106	252	28	54	55	154	333	108	4471	938	1005	794	38	48	1	133	101	34	14	58	113	48
OTU	k__Bacteria; p__Firmicutes; c__Bacilli; o__Lactobacillales; f__Carnobacteriaceae; g__Granulicatella	2	2	3	6	9	2	5	3	16	16	4	5	5	5	1	19	7	2	0	3	1	5	3	11	5	5	1	4	2	0	2	1	3	2	6	2	7	1	3	3	1	1	10	4	7	5	2	2
OTU	k__Bacteria; p__Firmicutes; c__Clostridia; o__Clostridiales; f__Ruminococcaceae; g__uncultured; s__uncultured_bacterium	715	124	35	158	353	163	232	87	0	3431	190	59	140	228	30	170	25	29	27	161	17	1727	65	131	53	80	2	0	1	0	0	3	0	0	4	4	2	0	5	2	557	14	5	179	85	172	82	337
OTU	k__Bacteria; p__Firmicutes; c__Clostridia; o__Clostridiales; f__Christensenellaceae; g__uncultured; s__uncultured_bacterium	322	160	105	103	154	75	79	104	176	162	133	24	126	135	1	0	0	0	0	0	0	0	0	1	0	2	0	6	1	1	0	0	0	0	1	0	0	0	2	3	0	53	3	25	7	40	75	21
OTU	k__Bacteria; p__Firmicutes; c__Erysipelotrichia; o__Erysipelotrichales; f__Erysipelotrichaceae; g__Holdemania	3	15	1	44	15	21	44	19	16	41	14	6	10	8	16	19	14	29	7	31	10	58	15	22	12	31	12	28	16	69	22	10	64	16	24	1	16	30	0	0	0	0	0	0	0	0	0	0
OTU	k__Bacteria; p__Firmicutes; c__Bacilli; o__Lactobacillales; f__Lactobacillaceae; g__Lactobacillus; s__uncultured_bacterium	0	1	0	0	0	0	0	0	0	0	0	0	3	0	3	92	102	247	113	119	42	369	116	968	53	202	0	0	0	0	0	0	0	0	0	0	1	1	4	0	0	0	0	0	0	0	0	0
OTU	k__Bacteria; p__Bacteroidetes; c__Bacteroidia; o__Bacteroidales; f__Bacteroidaceae; g__Bacteroides; s__uncultured_bacterium	33	35	7	35	44	29	18	41	29	10	15	1	38	39	2	18	1	2	0	1	0	5	0	5	3	12	0	1	1	1	0	1	34	0	1	0	0	0	1	0	143	7	2	2	0	3	7	0
OTU	k__Bacteria; p__Firmicutes; c__Clostridia; o__Clostridiales; f__Ruminococcaceae; g__Incertae_Sedis; s__uncultured_bacterium	11	10	2	1	3	2	2	1	3	35	3	7	0	0	0	1	0	0	0	0	0	1	1	0	0	0	2	6	0	0	0	17	7	0	30	3	6	2	1	0	2	0	0	0	0	1	0	0
OTU	k__Bacteria; p__Bacteroidetes; c__Bacteroidia; o__Bacteroidales; f__Porphyromonadaceae; g__Odoribacter	158	159	10	28	48	66	83	15	101	30	11	1	41	89	94	18	15	5	2	73	2	71	29	138	25	76	9	28	234	158	4	0	124	6	27	1	3	7	0	0	0	347	477	161	70	255	222	22
OTU	k__Bacteria; p__Bacteroidetes; c__Bacteroidia; o__Bacteroidales; f__Bacteroidaceae; g__Bacteroides; s__uncultured_bacterium	3	2	0	6	3	3	0	0	8	1	3	0	5	0	3	0	0	0	0	0	0	0	0	0	0	0	3	2	28	38	17	2	24	2	0	0	1	8	0	1	86	15	16	9	12	15	36	3
OTU	k__Bacteria; p__Firmicutes; c__Clostridia; o__Clostridiales; f__Lachnospiraceae; g__Lachnospira; s__uncultured_bacterium	0	111	207	9	0	5	39	9	0	1	0	0	1	0	0	0	0	0	0	0	0	0	0	0	0	0	0	3	0	0	14	72	3	0	3	0	16	276	7	24	15	0	0	0	0	0	0	0
OTU	k__Bacteria; p__Firmicutes; c__Clostridia; o__Clostridiales; f__Lachnospiraceae; g__Pseudobutyrivibrio; s__uncultured_bacterium	1372	2192	4551	2332	1678	3856	1347	1718	1231	1644	3118	15061	3263	4235	926	1027	828	929	371	1667	1596	2154	2056	3225	1913	472	5930	7575	327	1198	6678	16008	6801	5494	3786	20151	17287	13311	6942	3500	3634	112	3	830	777	720	2379	2285
OTU	k__Bacteria; p__Firmicutes; c__Clostridia; o__Clostridiales; f__Lachnospiraceae; g__uncultured; s__uncultured_bacterium	491	254	837	194	269	237	266	393	478	628	379	942	322	786	201	273	62	41	39	422	92	852	192	855	125	443	12	165	103	300	163	1141	495	2636	1056	4426	691	234	268	229	305	190	34	196	237	166	341	214
OTU	k__Bacteria; p__Bacteroidetes; c__Bacteroidia; o__Bacteroidales; f__Bacteroidaceae; g__Bacteroides; s__uncultured_organism	2143	1474	931	1907	1483	873	1921	2333	3110	2237	2091	230	3106	2778	135	204	10	6	12	219	0	86	37	124	14	109	2378	1405	1750	2350	1113	562	1473	547	1623	183	1206	1393	153	406	3152	754	2432	382	203	447	657	279
OTU	k__Bacteria; p__Bacteroidetes; c__Bacteroidia; o__Bacteroidales; f__Prevotellaceae; g__Prevotella	0	0	0	0	0	0	0	0	0	0	0	0	0	0	15	0	102	20	31	3	6	0	15	2	31	1	0	0	0	0	0	0	0	0	0	0	0	0	0	0	0	0	0	0	0	0	0	0
OTU	k__Bacteria; p__Firmicutes; c__Erysipelotrichia; o__Erysipelotrichales; f__Erysipelotrichaceae; g__uncultured	579	613	161	310	169	237	354	417	422	697	232	314	142	288	39	100	1	5	2	30	2	39	24	34	23	30	558	3302	744	790	823	1732	2077	960	5220	1861	2089	501	1279	353	401	213	805	70	290	59	201	130
OTU	k__Bacteria; p__Bacteroidetes; c__Bacteroidia; o__Bacteroidales; f__Prevotellaceae; g__Prevotella; s__uncultured_bacterium	1	0	0	0	0	0	0	0	0	0	0	0	1	0	4	5	28	45	51	27	17	3	35	16	67	18	0	0	0	0	0	0	0	0	0	0	0	0	0	0	0	3	1	1	3	2	1	6
OTU	k__Bacteria; p__Bacteroidetes; c__Bacteroidia; o__Bacteroidales; f__Porphyromonadaceae; g__Coprobacter; s__uncultured_organism	503	40	20	174	72	92	1427	685	934	612	80	2	445	309	0	0	0	0	0	0	0	1	0	0	0	1	15	31	72	1267	50	1	261	12	16	3	30	39	2	13	0	7	96	28	26	71	321	9
OTU	k__Bacteria; p__Firmicutes; c__Clostridia; o__Clostridiales; f__Lachnospiraceae; g__Incertae_Sedis; s__uncultured_bacterium	431	981	1606	1562	1644	1628	2106	3008	741	70	2000	351	3632	1214	104	178	200	307	208	482	180	32	378	181	192	33	0	7	6	0	0	1	0	1	1	1	0	0	1	10	0	0	2	1	0	0	0	1
OTU	k__Bacteria; p__Firmicutes; c__Clostridia; o__Clostridiales; f__Lachnospiraceae; g__Incertae_Sedis; s__uncultured_organism	0	1	0	1	0	0	0	4	1	8	2	1	1	2	1	0	0	0	0	0	0	0	0	0	0	0	899	420	46	172	180	309	335	571	26	53	149	30	6802	687	29	0	0	0	1	0	2	0
OTU	k__Bacteria; p__Firmicutes; c__Clostridia; o__Clostridiales; f__Christensenellaceae; g__uncultured; s__uncultured_bacterium	0	0	0	0	0	0	0	0	0	0	0	0	0	0	1	1	1	4	0	14	0	11	0	3	3	12	0	0	0	0	0	0	0	0	0	0	0	0	0	0	0	19	0	69	0	76	120	0
OTU	k__Bacteria; p__Firmicutes; c__Negativicutes; o__Selenomonadales; f__Acidaminococcaceae; g__Phascolarctobacterium; s__uncultured_bacterium	281	322	189	197	84	25	77	136	342	16	37	80	403	152	1450	369	87	4	5	137	16	102	81	20	251	157	817	1424	906	1390	1560	487	984	1518	121	503	1018	778	58	291	238	23	126	228	125	503	427	279
OTU	k__Bacteria; p__Bacteroidetes; c__Bacteroidia; o__Bacteroidales; f__Rikenellaceae; g__Alistipes; s__uncultured_bacterium	253	169	30	224	371	230	140	125	282	190	82	3	290	254	35	28	4	4	5	39	0	18	12	81	16	90	12	9	23	283	31	10	171	5	38	2	16	33	0	4	675	115	122	77	44	153	97	7
OTU	k__Bacteria; p__Firmicutes; c__Negativicutes; o__Selenomonadales; f__Veillonellaceae; g__Megamonas; s__uncultured_bacterium	0	5	0	0	0	0	2	1	1	0	0	11	0	1	0	0	0	0	0	0	0	0	0	0	0	0	0	0	0	0	0	0	1	0	1	0	0	0	0	0	0	23	27	95	25	48	81	76
OTU	k__Bacteria; p__Firmicutes; c__Clostridia; o__Clostridiales; f__Ruminococcaceae; g__Incertae_Sedis; s__uncultured_bacterium	1	6	1	3	4	3	1	0	1	25	3	2	0	0	4	6	1	0	0	0	3	8	4	4	0	1	4	17	2	1	0	16	4	0	21	2	2	1	0	0	6	3	1	0	1	0	0	0
OTU	k__Bacteria; p__Bacteroidetes; c__Bacteroidia; o__Bacteroidales; f__Prevotellaceae; g__Prevotella; s__uncultured_bacterium	0	0	0	0	0	0	0	0	0	0	0	1	0	0	5	16	65	51	63	47	25	8	35	8	65	13	0	0	0	0	0	0	0	0	0	0	0	0	0	0	0	5	0	2	5	6	2	1
OTU	k__Bacteria; p__Bacteroidetes; c__Bacteroidia; o__Bacteroidales; f__Prevotellaceae; g__Alloprevotella; s__uncultured_bacterium	0	1	3	0	0	0	0	0	1	1	1	0	46	0	4835	381	4629	3669	2892	3371	9004	71	4853	330	2488	546	1	0	1	1	0	0	2	0	2	2	2	2	0	0	0	1	1	1	0	2	0	0
OTU	k__Bacteria; p__Bacteroidetes; c__Bacteroidia; o__Bacteroidales; f__Rikenellaceae; g__Alistipes; s__uncultured_bacterium	0	0	0	0	0	0	0	0	0	0	0	0	0	0	0	0	0	0	0	0	0	0	0	0	0	0	0	0	0	0	0	0	0	0	0	0	0	0	0	0	0	9	45	9	5	26	8	1
OTU	k__Bacteria; p__Firmicutes; c__Clostridia; o__Clostridiales; f__Lachnospiraceae	1	0	7	0	0	0	0	0	0	0	2	2	1	0	12	0	0	2	1	0	6	0	2	3	6	1	13	2	0	5	52	40	15	3	0	10	41	28	2	10	2	1	0	1	0	1	3	4
OTU	k__Bacteria; p__Proteobacteria; c__Gammaproteobacteria; o__Enterobacteriales; f__Enterobacteriaceae; g__Enterobacter	25	0	69	0	1	3	92	3	0	3	1	19	1	2	0	0	4	0	0	0	0	0	0	0	0	0	1	8	39	0	0	0	0	0	4	0	2	2	1	902	0	0	0	0	0	0	0	0
OTU	k__Bacteria; p__Bacteroidetes; c__Bacteroidia; o__Bacteroidales; f__Prevotellaceae; g__Prevotella; s__uncultured_bacterium	0	0	2	0	0	0	0	0	1	2	0	0	13	0	170	22	429	649	493	328	27	4	234	171	398	218	0	0	0	0	0	0	0	0	2	0	1	0	0	0	0	0	0	1	0	0	0	0
OTU	k__Bacteria; p__Bacteroidetes; c__Bacteroidia; o__Bacteroidales; f__Prevotellaceae; g__Prevotella; s__uncultured_bacterium	0	0	0	0	0	0	0	0	0	0	0	0	0	0	0	0	1	0	1	0	0	0	1	1	0	0	0	0	0	0	0	0	0	0	0	0	0	0	0	0	0	23	7	30	39	21	17	22
OTU	k__Bacteria; p__Firmicutes; c__Negativicutes; o__Selenomonadales; f__Veillonellaceae; g__Megamonas; s__uncultured_bacterium	38	554	50	302	196	134	292	367	56	0	104	1364	142	125	0	0	0	0	0	1	0	0	0	1	0	3	0	3	0	0	0	0	1	0	0	0	0	0	1	1	0	9	12	64	18	18	34	52
OTU	k__Bacteria; p__Firmicutes; c__Clostridia; o__Clostridiales; f__Defluviitaleaceae; g__uncultured; s__uncultured_bacterium	3	51	20	28	5	10	10	15	5	0	6	31	6	3	144	1	11	23	8	18	59	0	15	2	20	2	1	5	1	12	5	1	4	0	1	1	1	15	0	0	16	9	0	0	0	4	2	0
OTU	k__Bacteria; p__Bacteroidetes; c__Bacteroidia; o__Bacteroidales; f__Bacteroidaceae; g__Bacteroides; s__uncultured_bacterium	2	2	4	7	1	3	2	1	1	0	9	0	9	0	0	0	0	0	0	0	0	0	0	0	0	0	18	0	16	0	7	4	20	33	0	4	3	19	0	11	0	0	1	0	0	0	4	0
OTU	k__Bacteria; p__Bacteroidetes; c__Bacteroidia; o__Bacteroidales; f__Prevotellaceae; g__Prevotella; s__uncultured_bacterium	0	0	0	0	0	0	0	0	0	0	0	1	4	0	28	10	144	125	235	96	27	14	131	32	140	65	0	0	0	0	0	0	0	0	0	1	0	0	0	0	0	0	1	0	0	0	0	1
OTU	k__Bacteria; p__Firmicutes; c__Clostridia; o__Clostridiales; f__Ruminococcaceae; g__uncultured; s__uncultured_bacterium	57	150	1	38	117	64	44	34	39	43	16	6	52	19	18	29	39	57	16	79	3	31	21	28	32	100	0	3	0	0	0	0	0	0	0	0	0	0	0	0	0	32	11	85	1	191	169	21
OTU	k__Bacteria; p__Firmicutes; c__Clostridia; o__Clostridiales; f__Family_XIII; g__Incertae_Sedis	7	23	1	14	21	23	12	19	38	0	7	0	35	10	0	0	0	0	0	0	0	0	0	0	0	0	0	1	0	0	0	0	0	0	0	0	0	0	0	0	0	5	0	0	0	2	2	0
OTU	k__Bacteria; p__Firmicutes; c__Clostridia; o__Clostridiales; f__Lachnospiraceae; g__uncultured; s__uncultured_bacterium	89	532	40	58	260	249	160	310	603	1	131	15	105	341	0	0	0	0	0	0	0	0	0	0	0	0	0	3	1	0	0	1	0	0	0	0	0	0	0	4	5	1	0	1	2	0	0	2
OTU	k__Bacteria; p__Bacteroidetes; c__Bacteroidia; o__Bacteroidales; f__Porphyromonadaceae; g__Odoribacter; s__uncultured_bacterium	0	0	0	1	0	0	0	0	0	0	0	0	0	0	0	0	0	0	0	0	0	0	0	0	0	0	0	0	0	0	0	0	0	0	0	0	0	0	0	0	0	37	232	7	0	33	18	0
OTU	k__Bacteria; p__Bacteroidetes; c__Bacteroidia; o__Bacteroidales; f__Bacteroidaceae; g__Bacteroides; s__uncultured_bacterium	6155	6461	7394	5217	4982	4753	4092	4411	7674	6576	5310	2402	3321	5804	1148	2404	116	38	30	728	9	255	71	118	451	3944	6424	5386	11390	10754	6986	3280	5419	9558	963	6673	7802	6444	2827	5151	14048	1637	8365	1406	505	677	310	451
OTU	k__Bacteria; p__Firmicutes; c__Clostridia; o__Clostridiales; f__Ruminococcaceae; g__Ruminococcus; s__uncultured_bacterium	665	413	568	595	808	1031	810	1204	414	2132	636	4182	631	475	0	2	0	0	0	0	0	3	1	0	1	13	4	15	1	0	0	5	0	1	5515	1629	1761	404	5	1	327	315	0	0	41	77	169	2
OTU	k__Bacteria; p__Firmicutes; c__Clostridia; o__Clostridiales; f__Ruminococcaceae; g__Incertae_Sedis; s__uncultured_bacterium	9	93	2	31	10	8	3	3	5	232	18	33	23	5	264	36	9	68	31	77	136	24	67	52	142	24	116	162	62	135	460	207	196	15	215	45	324	452	8	36	44	40	50	45	6	26	45	60
OTU	k__Bacteria; p__Firmicutes; c__Clostridia; o__Clostridiales; f__Ruminococcaceae; g__Incertae_Sedis; s__uncultured_bacterium	0	0	0	0	0	0	0	0	0	0	0	0	2	0	2	187	32	15	2	76	1	587	11	121	116	174	0	0	0	0	0	0	0	0	0	0	0	0	0	0	0	0	0	0	0	0	0	0
OTU	k__Bacteria; p__Bacteroidetes; c__Bacteroidia; o__Bacteroidales; f__Bacteroidaceae; g__Bacteroides; s__uncultured_bacterium	11	6	55	16	8	8	9	0	24	1	34	1	20	3	24	1	0	0	1	5	1	0	5	2	29	7	57	4	81	81	63	20	88	55	4	13	58	72	15	30	67	29	70	37	23	11	11	24
OTU	k__Bacteria; p__Bacteroidetes; c__Bacteroidia; o__Bacteroidales; f__Prevotellaceae; g__Alloprevotella; s__uncultured_bacterium	0	0	0	0	0	0	0	0	0	0	0	0	1	0	66	0	222	124	150	11	86	0	107	9	97	3	0	0	0	0	0	0	0	0	0	0	0	0	0	0	0	0	0	0	0	0	0	0
OTU	k__Bacteria; p__Firmicutes; c__Clostridia; o__Clostridiales; f__Ruminococcaceae; g__Flavonifractor	12	15	3	29	11	11	43	10	38	17	10	8	7	9	64	13	11	1	9	8	1	22	0	4	6	25	12	56	64	69	15	2	98	8	59	2	8	21	0	1	223	19	145	31	6	18	44	3
OTU	k__Bacteria; p__Firmicutes; c__Clostridia; o__Clostridiales; f__Lachnospiraceae; g__Incertae_Sedis; s__uncultured_bacterium	389	102	75	124	178	103	209	175	141	372	305	274	251	98	843	94	482	82	205	849	459	137	1184	920	285	141	1676	1909	501	1294	500	1244	1591	1099	189	315	1344	233	1439	259	390	220	427	381	195	77	288	508
OTU	k__Bacteria; p__Bacteroidetes; c__Bacteroidia; o__Bacteroidales; f__Prevotellaceae; g__Prevotella; s__uncultured_bacterium	0	0	0	0	0	0	0	0	0	0	0	0	2	0	9	5	44	37	78	26	9	4	35	6	42	9	0	0	0	0	0	0	0	0	0	0	0	0	0	0	0	0	0	0	0	0	0	1
OTU	k__Bacteria; p__Bacteroidetes; c__Bacteroidia; o__Bacteroidales; f__Porphyromonadaceae; g__Parabacteroides; s__uncultured_bacterium	0	0	0	1	0	0	3	0	4	1	1	0	3	3	0	0	0	0	0	0	0	0	0	0	0	0	0	1	0	0	0	0	0	0	0	0	3	0	1	1	0	2	4	1	3	14	19	35
OTU	k__Bacteria; p__Bacteroidetes; c__Bacteroidia; o__Bacteroidales; f__Prevotellaceae; g__Prevotella; s__uncultured_bacterium	0	0	0	1	0	0	0	0	0	0	0	0	0	0	1	0	9	7	12	0	2	1	1	1	7	1	0	0	0	0	0	0	0	0	0	0	0	0	0	0	0	23	12	24	51	12	22	33
OTU	k__Bacteria; p__Firmicutes; c__Clostridia; o__Clostridiales; f__Ruminococcaceae; g__uncultured; s__uncultured_bacterium	102	33	34	53	121	26	40	54	20	158	26	11	91	11	0	0	0	0	0	0	0	0	0	0	0	0	0	2	0	0	0	0	0	0	0	0	0	0	0	0	0	0	0	0	0	0	0	0
OTU	k__Bacteria; p__Bacteroidetes; c__Bacteroidia; o__Bacteroidales; f__Prevotellaceae; g__Prevotella; s__uncultured_bacterium	0	0	0	0	0	0	0	0	0	0	0	0	0	0	0	0	0	0	2	0	0	0	0	0	0	0	0	0	0	0	0	0	0	0	0	0	0	0	1	0	0	33	14	25	47	26	10	27
OTU	k__Bacteria; p__Bacteroidetes; c__Bacteroidia; o__Bacteroidales; f__Prevotellaceae; g__Prevotella; s__uncultured_bacterium	0	0	0	0	0	0	0	0	0	1	0	0	0	0	0	0	1	1	0	0	0	0	0	0	1	0	1	0	0	0	0	0	0	0	0	0	0	0	0	0	0	30	13	22	41	23	10	17
OTU	k__Bacteria; p__Firmicutes; c__Clostridia; o__Clostridiales; f__Lachnospiraceae; g__Roseburia; s__uncultured_bacterium	13	44	26	3	6	14	7	11	10	54	39	53	27	15	43	10	6	2	2	31	27	20	42	87	22	21	55	227	23	64	47	228	319	273	42	121	591	210	41	50	0	21	124	30	15	9	116	318
OTU	k__Bacteria; p__Bacteroidetes; c__Bacteroidia; o__Bacteroidales; f__Prevotellaceae; g__Prevotella; s__uncultured_bacterium	0	0	0	0	0	0	0	0	0	0	0	0	0	0	0	0	0	2	0	0	0	1	0	0	0	0	0	0	0	0	0	0	0	0	0	0	0	0	0	0	0	16	8	26	32	11	10	20
OTU	k__Bacteria; p__Firmicutes; c__Clostridia; o__Clostridiales; f__Lachnospiraceae; g__uncultured; s__uncultured_bacterium	12	80	299	82	14	41	76	55	6	0	56	462	20	16	0	0	0	0	0	0	0	0	0	0	0	0	0	0	0	0	0	0	0	0	0	0	0	0	0	0	161	0	0	0	0	0	0	0
OTU	k__Bacteria; p__Bacteroidetes; c__Bacteroidia; o__Bacteroidales; f__S24-7; g__uncultured_bacterium;	4	6	22	21	14	23	14	0	8	0	48	0	27	4	0	0	0	0	0	0	0	0	0	0	0	0	0	1	0	0	0	0	0	0	0	0	0	0	0	0	0	0	0	0	0	0	0	0
OTU	k__Bacteria; p__Firmicutes; c__Clostridia; o__Clostridiales; f__Lachnospiraceae; g__Lachnospira; s__uncultured_bacterium	129	2171	735	240	178	499	1082	393	119	50	558	221	182	89	0	67	199	16	46	4	3	1	3	2	4	1	3	27	37	51	53	89	38	258	21	71	3	147	3	8	45	26	0	0	0	0	0	0
OTU	k__Bacteria; p__Bacteroidetes; c__Bacteroidia; o__Bacteroidales; f__Bacteroidaceae; g__Bacteroides; s__uncultured_bacterium	1	2	6	5	2	4	3	0	2	0	15	0	8	1	0	0	0	0	0	0	0	0	0	0	0	0	19	0	8	0	6	5	13	14	1	1	8	7	1	7	0	13	19	13	38	30	35	23
OTU	k__Bacteria; p__Firmicutes; c__Clostridia; o__Clostridiales; f__Ruminococcaceae; g__Anaerotruncus; s__uncultured_bacterium	0	0	0	0	0	0	0	0	0	0	0	0	0	0	0	1	0	0	0	0	0	0	0	0	0	0	0	0	0	0	0	0	0	0	0	0	0	0	0	0	0	92	3	6	0	142	79	0
OTU	k__Bacteria; p__Firmicutes; c__Clostridia; o__Clostridiales; f__Ruminococcaceae; g__uncultured; s__uncultured_bacterium	60	212	37	430	202	140	320	596	424	799	414	143	238	408	19	228	321	55	188	319	22	612	251	945	130	1154	3	1	1	0	0	1	0	1	1	0	0	0	0	5	0	600	2	458	183	762	308	369
OTU	k__Bacteria; p__Firmicutes; c__Clostridia; o__Clostridiales; f__Ruminococcaceae; g__uncultured; s__uncultured_bacterium	17	695	29	271	218	292	258	382	151	459	290	5	14	85	0	0	0	0	0	2	1	3	0	1	0	6	1	11	2	0	0	0	0	0	0	0	0	0	0	1	0	10	0	1	0	0	0	1
OTU	k__Bacteria; p__Bacteroidetes; c__Bacteroidia; o__Bacteroidales; f__Prevotellaceae; g__Prevotella	0	0	0	0	0	0	0	0	0	0	0	0	0	0	3	7	48	44	43	23	12	4	28	11	24	11	0	0	0	0	0	0	0	0	0	0	0	0	0	0	0	2	0	0	0	0	1	0
OTU	k__Bacteria; p__Bacteroidetes; c__Bacteroidia; o__Bacteroidales; f__Bacteroidaceae; g__Bacteroides; s__uncultured_organism	244	221	117	133	260	81	106	111	146	40	86	12	153	133	4	5	0	1	0	4	0	0	1	9	0	10	2	9	4	6	0	0	5	1	0	0	0	0	0	2	0	0	0	0	0	0	0	0
OTU	k__Bacteria; p__Firmicutes; c__Clostridia; o__Clostridiales; f__Lachnospiraceae	2	13	11	44	12	38	50	32	3	0	17	15	8	5	0	35	88	8	16	3	1	0	0	2	1	0	1	7	26	17	16	32	26	100	14	35	1	41	2	3	2	14	0	0	0	0	1	0
OTU	k__Bacteria; p__Firmicutes; c__Clostridia; o__Clostridiales; f__Ruminococcaceae; g__uncultured	43	101	53	78	67	61	79	25	77	63	52	47	53	42	12	23	64	74	82	94	124	2	110	69	58	68	0	3	0	0	0	0	0	0	0	0	0	0	0	0	0	59	10	75	32	67	90	5
OTU	k__Bacteria; p__Firmicutes; c__Clostridia; o__Clostridiales; f__Ruminococcaceae; g__Oscillospira; s__uncultured_bacterium	6	12	16	17	11	22	25	6	7	0	6	12	19	1	1	7	6	11	7	1	0	0	2	2	4	5	0	0	0	0	0	0	0	0	0	0	0	0	0	0	0	0	0	1	0	0	0	0
OTU	k__Bacteria; p__Bacteroidetes; c__Bacteroidia; o__Bacteroidales; f__Prevotellaceae; g__Prevotella; s__uncultured_bacterium	0	0	0	0	0	0	0	0	0	0	0	0	0	0	192	0	387	133	201	40	52	0	216	13	276	30	0	0	0	1	0	0	0	0	0	0	0	0	0	0	0	0	0	0	0	0	0	0
OTU	k__Bacteria; p__Firmicutes; c__Clostridia; o__Clostridiales; f__Lachnospiraceae; g__Blautia; s__uncultured_bacterium	54	36	30	15	19	18	8	20	37	83	37	199	47	307	75	108	28	13	27	148	67	814	189	746	163	109	16	27	0	3	18	95	9	23	20	33	27	29	9	6	135	29	49	36	51	21	40	54
OTU	k__Bacteria; p__Bacteroidetes; c__Bacteroidia; o__Bacteroidales; f__Bacteroidaceae; g__Bacteroides; s__uncultured_bacterium	2525	5372	1912	5834	4256	6521	5877	4531	2736	354	7590	4322	6446	7158	0	7	0	3	2	3	1	9	5	0	2	27	5463	561	3504	32	1716	3800	1626	8853	281	5306	1985	2917	176	2891	1	792	3246	675	1386	1615	1618	859
OTU	k__Bacteria; p__Bacteroidetes; c__Bacteroidia; o__Bacteroidales; f__Prevotellaceae; g__Prevotella; s__uncultured_bacterium	0	0	0	0	0	0	0	0	0	0	0	0	0	0	0	0	0	0	0	0	0	0	0	0	3	0	0	0	0	0	0	0	0	0	0	0	0	0	0	0	0	18	17	29	46	30	16	18
OTU	k__Bacteria; p__Bacteroidetes; c__Bacteroidia; o__Bacteroidales	3	1	3	1	0	2	3	0	8	0	7	0	5	0	7	0	4	1	1	0	0	0	6	6	3	1	3	0	1	18	5	2	14	2	0	0	3	2	0	2	0	10	14	12	19	13	18	22
OTU	k__Bacteria; p__Firmicutes; c__Negativicutes; o__Selenomonadales; f__Veillonellaceae; g__Dialister; s__uncultured_bacterium	0	0	1	0	0	0	0	0	0	0	0	0	0	0	0	35	0	0	0	0	0	0	0	0	0	0	3	1	0	0	0	0	0	0	0	0	0	0	0	0	0	1784	0	0	0	0	0	0
OTU	k__Bacteria; p__Firmicutes; c__Clostridia; o__Clostridiales; f__Lachnospiraceae; g__Blautia; s__uncultured_bacterium	27	7	11	6	12	10	10	16	22	117	53	212	47	49	29	10	8	2	1	64	10	47	27	62	10	4	3	13	0	4	0	64	3	20	1	17	10	5	3	0	17	8	6	18	18	11	31	29
OTU	k__Bacteria; p__Firmicutes; c__Clostridia; o__Clostridiales; f__Lachnospiraceae; g__Incertae_Sedis	15	25	7	12	21	8	27	16	18	6	5	0	11	11	63	4	11	2	3	16	3	8	9	7	32	18	130	116	102	225	113	26	188	39	37	10	53	76	15	39	85	45	19	20	4	21	23	1
OTU	k__Bacteria; p__Bacteroidetes; c__Bacteroidia; o__Bacteroidales; f__Porphyromonadaceae; g__Parabacteroides	451	365	127	262	228	188	137	188	249	141	153	13	393	333	405	110	28	7	6	22	1	21	33	43	32	154	703	559	415	739	254	295	325	691	70	131	181	373	44	152	1550	424	749	205	165	235	255	203
OTU	k__Bacteria; p__Firmicutes; c__Clostridia; o__Clostridiales; f__Lachnospiraceae; g__uncultured	15	30	14	6	11	17	14	26	25	18	21	91	28	51	92	16	4	7	7	26	19	13	21	52	10	38	5	22	1	3	4	10	7	4	5	6	7	2	0	0	40	16	5	36	9	20	40	47
OTU	k__Bacteria; p__Firmicutes; c__Clostridia; o__Clostridiales; f__Ruminococcaceae; g__Ruminococcus; s__uncultured_bacterium	8925	398	569	184	644	472	182	227	400	41	131	38	1655	23	1	407	48	181	24	169	5	21	142	41	78	69	1	5	3	0	0	0	0	0	0	0	0	0	0	0	41	0	0	0	0	0	0	0
OTU	k__Bacteria; p__Firmicutes; c__Clostridia; o__Clostridiales; f__Ruminococcaceae; g__Incertae_Sedis; s__uncultured_bacterium	2	7	0	3	2	1	7	3	7	0	2	0	5	2	18	3	8	14	4	13	3	6	8	0	13	3	0	17	9	2	0	2	2	0	0	3	2	1	0	0	18	2	0	6	0	12	19	0
OTU	k__Bacteria; p__Firmicutes; c__Clostridia; o__Clostridiales; f__Ruminococcaceae; g__uncultured; s__uncultured_bacterium	0	0	0	0	0	0	0	0	0	0	0	0	1	0	5	5	3	13	8	10	5	0	1	0	5	33	0	0	0	0	0	0	0	0	0	0	0	0	0	0	0	62	39	41	8	35	29	30
OTU	k__Bacteria; p__Bacteroidetes; c__Bacteroidia; o__Bacteroidales; f__Porphyromonadaceae; g__Barnesiella	624	472	229	319	461	434	179	186	561	165	181	20	330	208	0	2	0	0	0	0	0	1	0	0	1	0	2	1	1	0	0	2	0	0	0	0	2	0	1	3	0	833	3665	447	245	934	575	221
OTU	k__Bacteria; p__Fusobacteria; c__Fusobacteriia; o__Fusobacteriales; f__boneC3G7; g__uncultured_bacterium;	2	5	7	6	17	2	2	0	7	1	5	5	23	3	1	7	0	0	2	1	0	4	0	8	2	4	19150	13515	12574	10307	22496	5368	3044	7539	7194	83	4759	6350	24806	35070	20	6	5	3	21	4	5	0
OTU	k__Bacteria; p__Proteobacteria; c__Gammaproteobacteria; o__Enterobacteriales; f__Enterobacteriaceae; g__Enterobacter	6	0	8	0	0	1	17	8	0	2	0	0	0	1	0	1	1	0	0	0	0	2	0	1	0	0	0	1	44	0	3	14	0	0	62	0	0	0	0	33	0	0	0	0	0	1	0	0
OTU	k__Bacteria; p__Bacteroidetes; c__Bacteroidia; o__Bacteroidales; f__Rikenellaceae; g__RC9_gut_group; s__uncultured_bacterium	0	0	0	0	0	0	0	0	0	0	0	0	8	0	616	276	237	222	104	1339	247	480	821	2969	498	1652	0	1	0	0	0	0	0	0	0	0	1	0	0	0	0	0	0	0	0	0	0	1
OTU	k__Bacteria; p__Firmicutes; c__Clostridia; o__Clostridiales; f__Lachnospiraceae	120	251	881	387	120	359	696	191	267	4	172	551	224	186	303	27	534	496	342	198	760	26	565	79	399	119	106	93	74	230	555	900	79	141	42	208	329	510	91	139	215	206	581	891	1023	426	299	534
OTU	k__Bacteria; p__Firmicutes; c__Clostridia; o__Clostridiales; f__Lachnospiraceae; g__Pseudobutyrivibrio; s__uncultured_bacterium	0	0	0	0	0	0	0	0	0	0	0	0	0	0	0	0	0	0	0	0	0	0	0	0	0	0	0	73	34	33	0	0	4	0	0	0	0	0	42	1	0	0	0	0	0	0	0	0
OTU	k__Bacteria; p__Firmicutes; c__Clostridia; o__Clostridiales; f__Lachnospiraceae; g__Incertae_Sedis; s__uncultured_organism	5	5	2	2	4	5	4	1	9	0	5	0	2	2	12	2	2	1	0	7	0	0	1	3	1	7	155	60	53	35	75	1	83	3	59	0	61	50	4	5	20	7	0	2	0	5	7	0
OTU	k__Bacteria; p__Bacteroidetes; c__Bacteroidia; o__Bacteroidales; f__Prevotellaceae; g__Prevotella; s__uncultured_bacterium	0	0	0	0	0	0	0	0	0	0	0	0	2	0	10	3	60	36	87	31	12	5	32	8	39	12	0	0	1	0	0	0	0	0	0	0	0	0	0	0	0	15	5	11	21	7	6	9
OTU	k__Bacteria; p__Firmicutes; c__Clostridia; o__Clostridiales; f__Defluviitaleaceae; g__uncultured; s__uncultured_organism	10	25	6	5	6	14	10	3	6	1	2	14	4	4	16	0	8	2	1	1	4	55	2	1	18	37	4	21	0	13	0	0	97	0	0	1	0	5	0	0	50	0	0	0	0	0	0	0
OTU	k__Bacteria; p__Firmicutes; c__Clostridia; o__Clostridiales; f__Ruminococcaceae; g__uncultured; s__uncultured_bacterium	16	33	4	41	37	28	38	24	22	0	5	1	29	47	32	29	24	25	3	9	0	2	7	7	12	67	1	35	19	83	4	2	132	3	1	6	1	34	2	0	123	12	18	10	2	7	13	0
OTU	k__Bacteria; p__Firmicutes; c__Clostridia; o__Clostridiales; f__Lachnospiraceae; g__Lachnospira; s__uncultured_bacterium	16	1347	343	1085	499	460	332	492	49	17	314	709	161	131	91	381	2054	991	1021	146	710	17	623	41	111	46	9	95	141	179	116	352	154	849	279	300	169	549	9	26	484	325	0	1590	284	1106	523	373
OTU	k__Bacteria; p__Firmicutes; c__Clostridia; o__Clostridiales; f__Lachnospiraceae	22	19	1	13	8	6	17	9	8	1	6	4	4	11	4	1	1	3	5	8	0	1	4	11	6	5	0	0	0	0	0	0	0	0	0	0	0	0	0	0	0	0	0	0	0	0	0	0
OTU	k__Bacteria; p__Firmicutes; c__Clostridia; o__Clostridiales; f__Ruminococcaceae; g__Incertae_Sedis; s__uncultured_bacterium	1	5	9	8	5	6	5	1	6	1	4	9	0	2	14	0	14	5	8	6	3	0	2	0	3	0	2	1	1	15	18	11	4	22	3	8	9	16	0	0	0	6	4	13	4	15	15	12
OTU	k__Bacteria; p__Bacteroidetes; c__Bacteroidia; o__Bacteroidales; f__Prevotellaceae; g__Prevotella; s__uncultured_bacterium	0	0	0	0	0	0	0	0	0	0	0	0	0	0	0	0	3	4	2	0	0	0	0	0	1	1	0	0	0	0	0	0	0	0	0	0	0	0	0	0	0	40	19	37	73	34	17	36
OTU	k__Bacteria; p__Firmicutes; c__Clostridia; o__Clostridiales; f__Lachnospiraceae; g__Blautia	8	12	2	10	14	5	11	23	18	24	6	3	57	10	88	33	7	5	4	68	2	142	27	140	106	113	0	1	0	8	0	1	2	0	0	0	0	2	0	0	8	47	0	23	7	150	183	3
[truncated: 6 more columns]
